# Supplementary material for: Cs2CO3-Initiated Trifluoro-Methylation of Chalcones and Ketones for Practical Synthesis of Trifluoromethylated Tertiary Silyl Ethers
Source: MDPI journal article supplement (doi:10.3390/molecules22050769), 2017-05-18

## *Supporting Information*

# **Cs<sub>2</sub>CO<sub>3</sub>–Initiated Trifluoromethylation of Chalcones and Ketones for Practical Synthesis of Trifluoromethylated Tertiary Silyl Ethers**

Cheng Dong, Xing-Feng Bai, Ji-Yuan Lv, Yu-Ming Cui, Jian Cao, Zhan-Jiang

Zheng\*, Li-Wen Xu\*

---

*Key Laboratory of Organosilicon Chemistry and Material Technology of Ministry of Education, Hangzhou Normal University, Hangzhou 311121, P. R. China. Fax: +86-571-28865135; Tel: +86-571-28865135; E-mail: zzjiang78@hznu.edu.cn, liwenxu@hznu.edu.cn.*

### **Table of Contents**

|                                                                            |     |
|----------------------------------------------------------------------------|-----|
| <sup>1</sup> H NMR and <sup>13</sup> C NMR spectra for compound 2a-2w..... | S2  |
| <sup>1</sup> H NMR and <sup>13</sup> C NMR spectra for compound 5a-5k..... | S25 |

**Figure S1  $^1\text{H}$  NMR spectra for compound 2a**

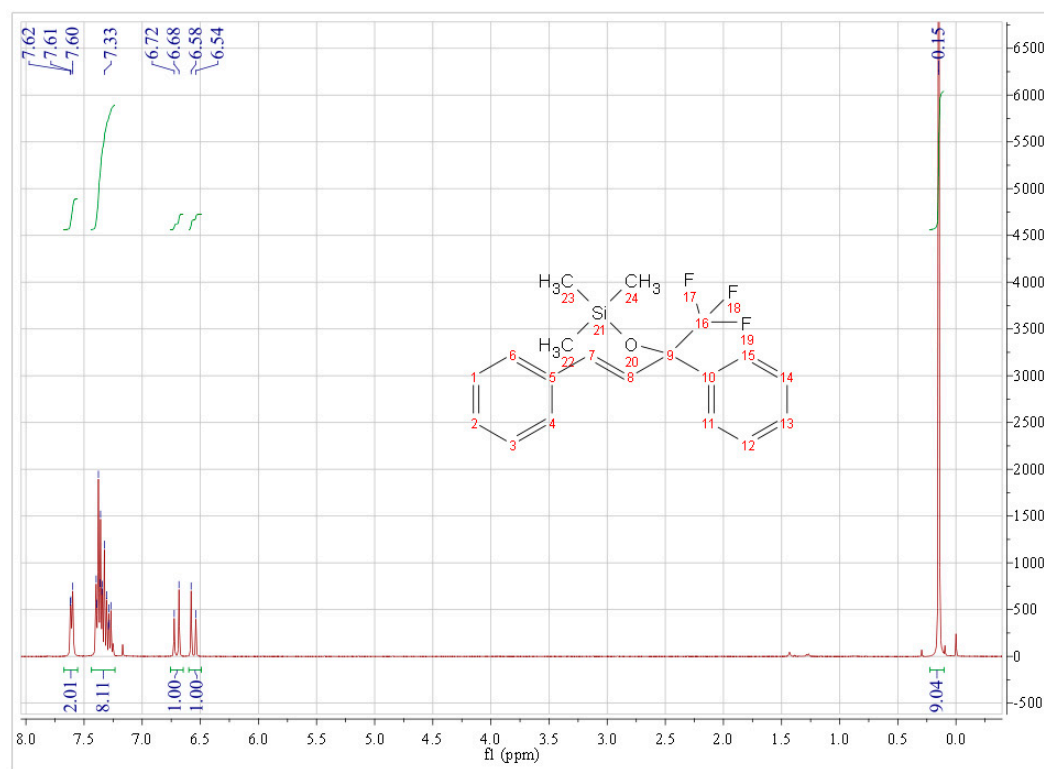

**Figure S2  $^{13}\text{C}$  NMR spectra for compound 2a**

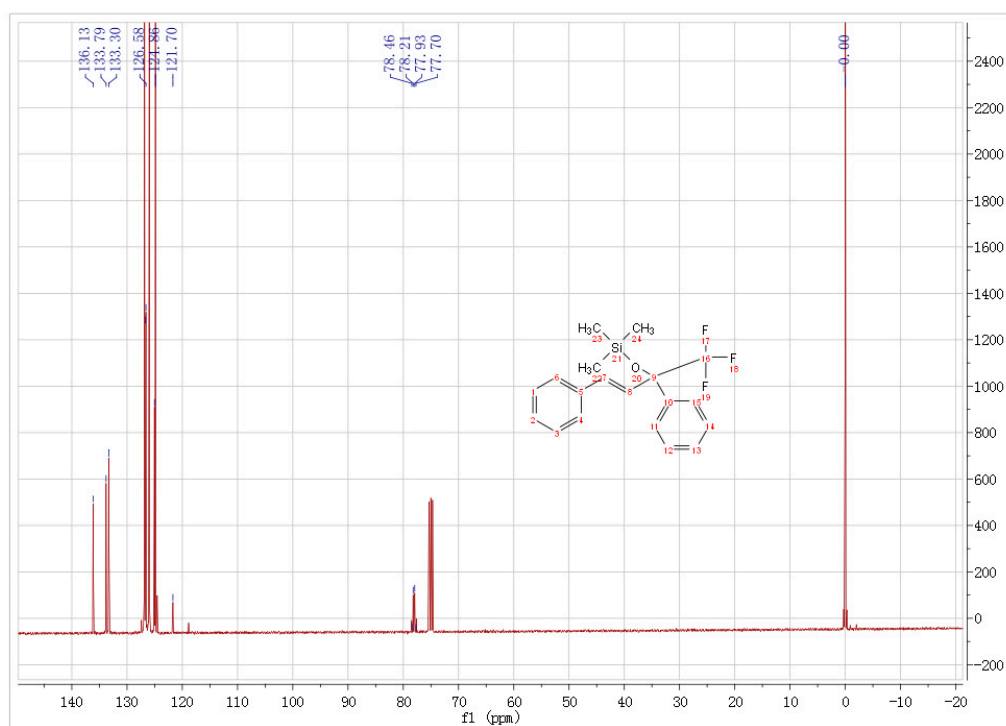

**Figure S3  $^1\text{H}$  NMR spectra for compound 2b**

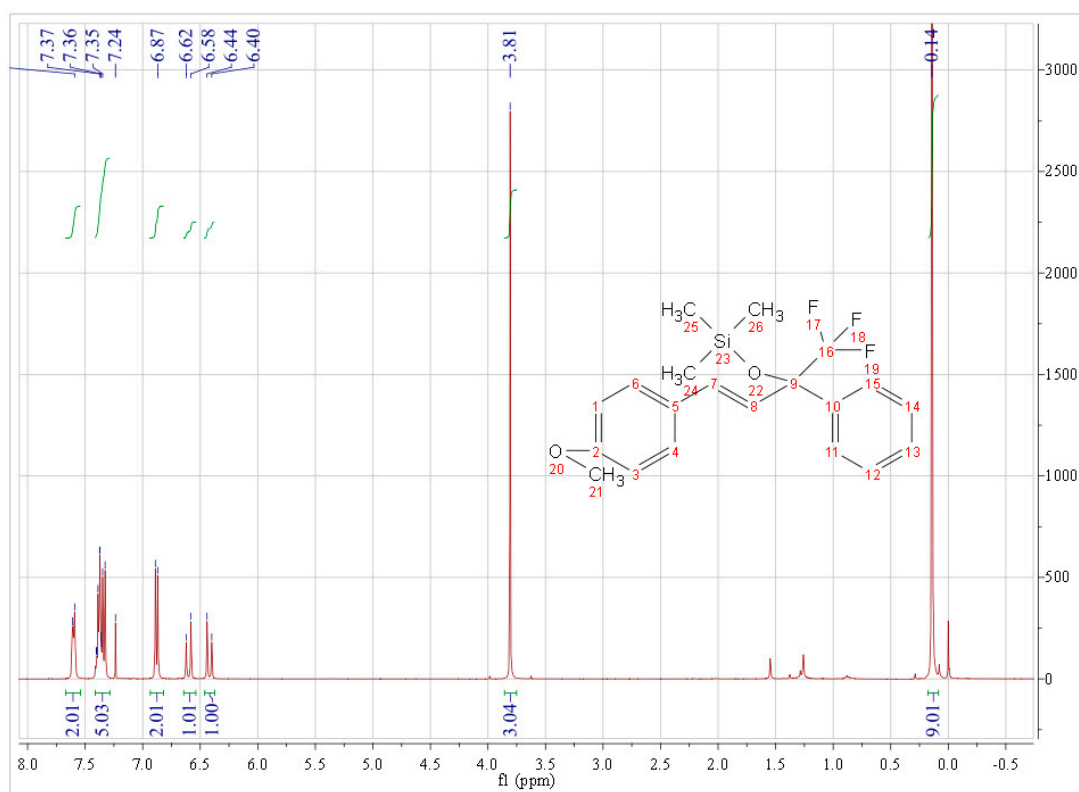

**Figure S4  $^{13}\text{C}$  NMR spectra for compound 2b**

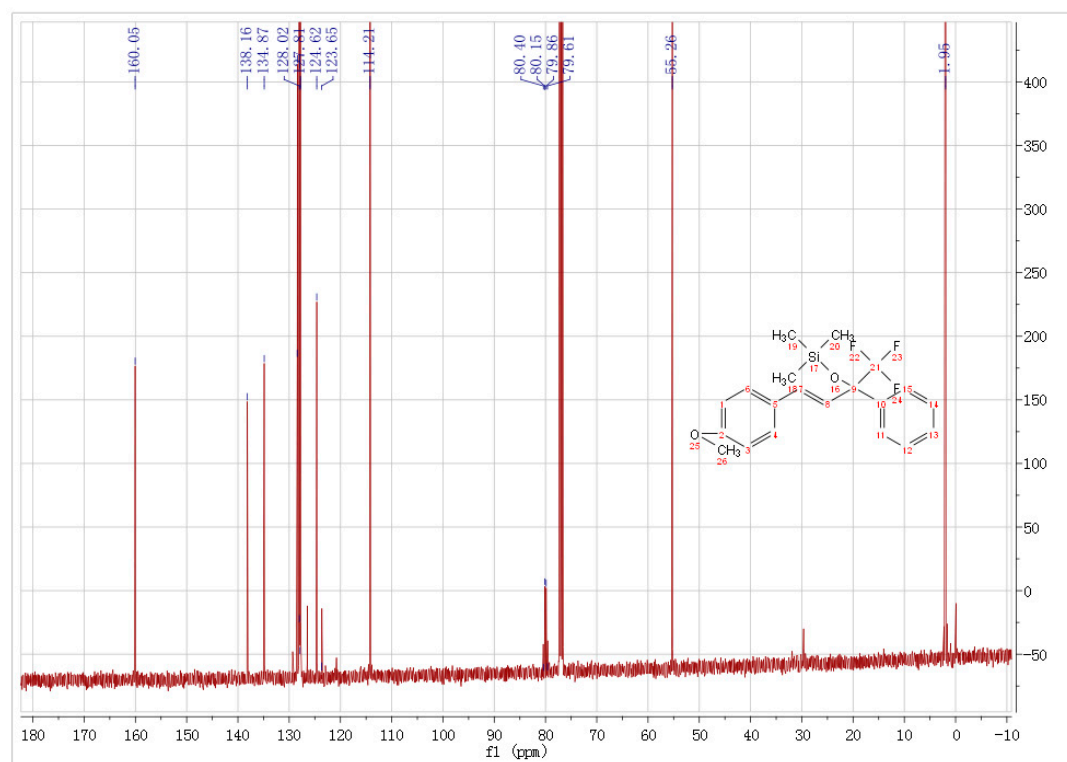

Figure S5  $^1\text{H}$  NMR spectra for compound 2c

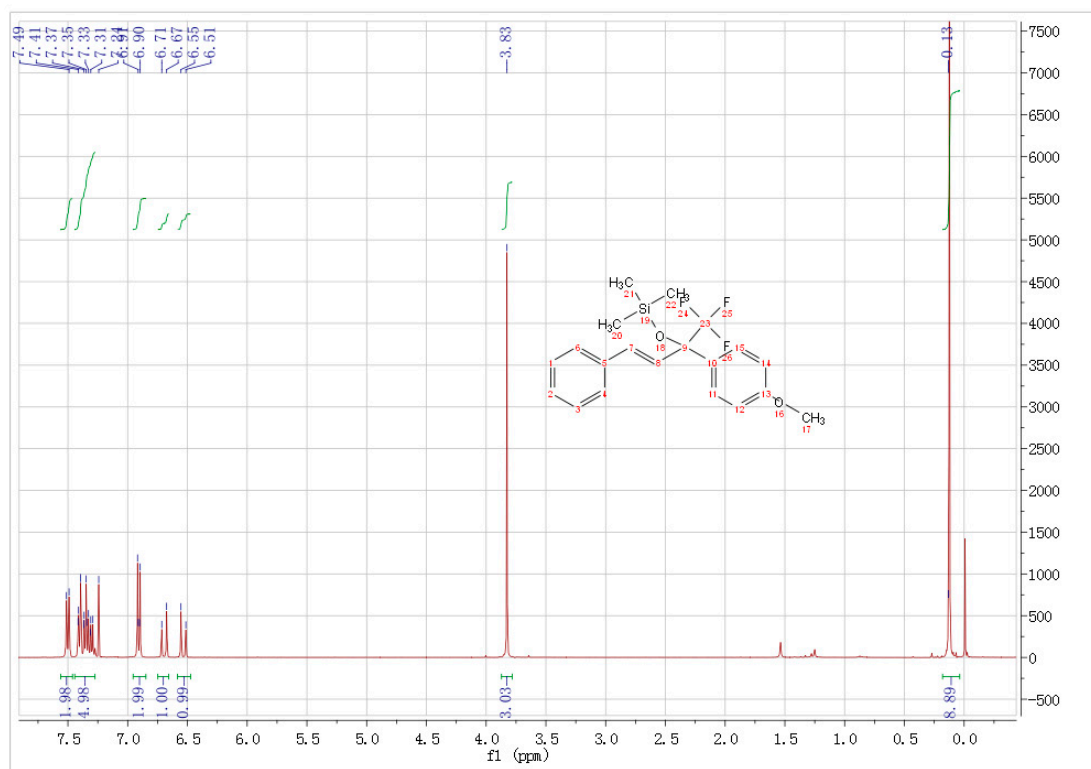

Figure S6  $^{13}\text{C}$  NMR spectra for compound 2c

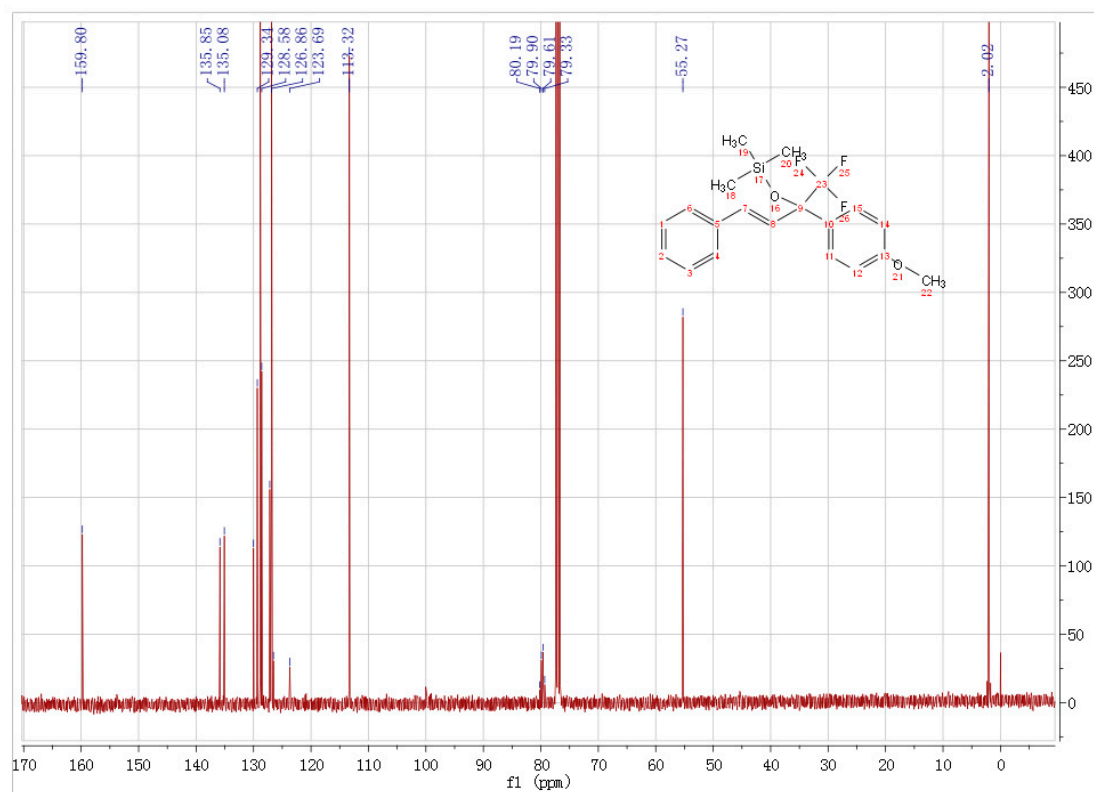



**Figure S7  $^1\text{H}$  NMR spectra for compound 2d**

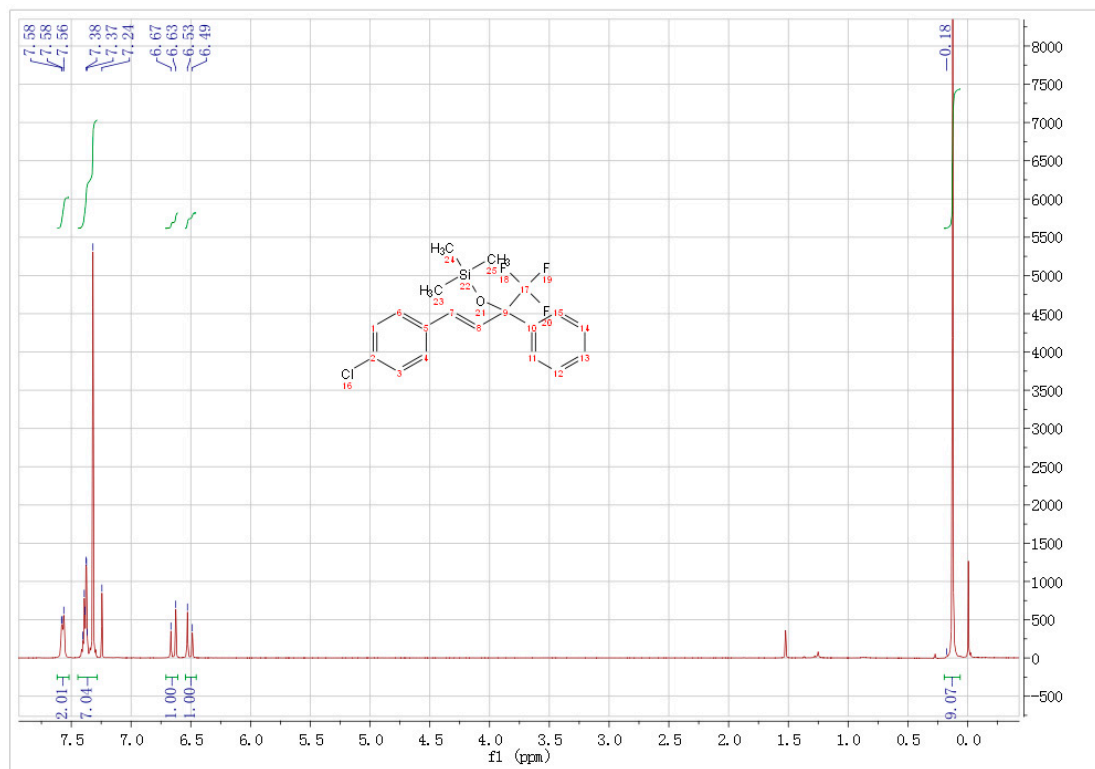

**Figure S8  $^{13}\text{C}$  NMR spectra for compound 2d**

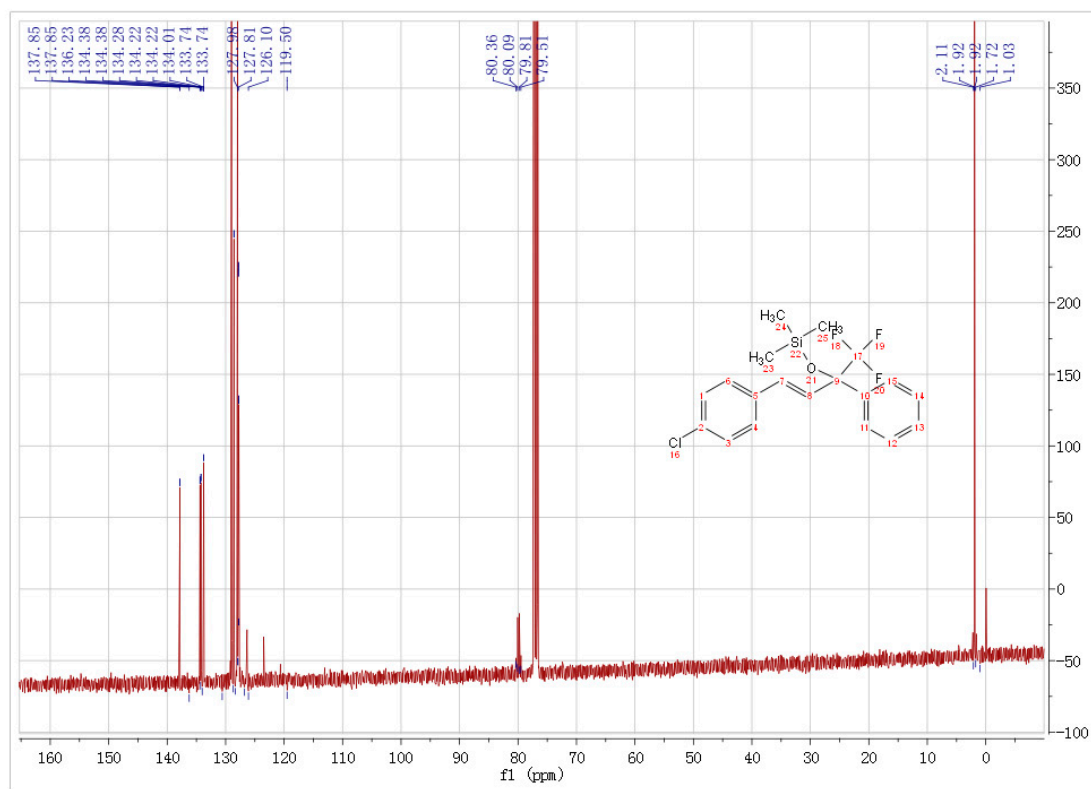

Figure S9  $^1\text{H}$  NMR spectra for compound 2e

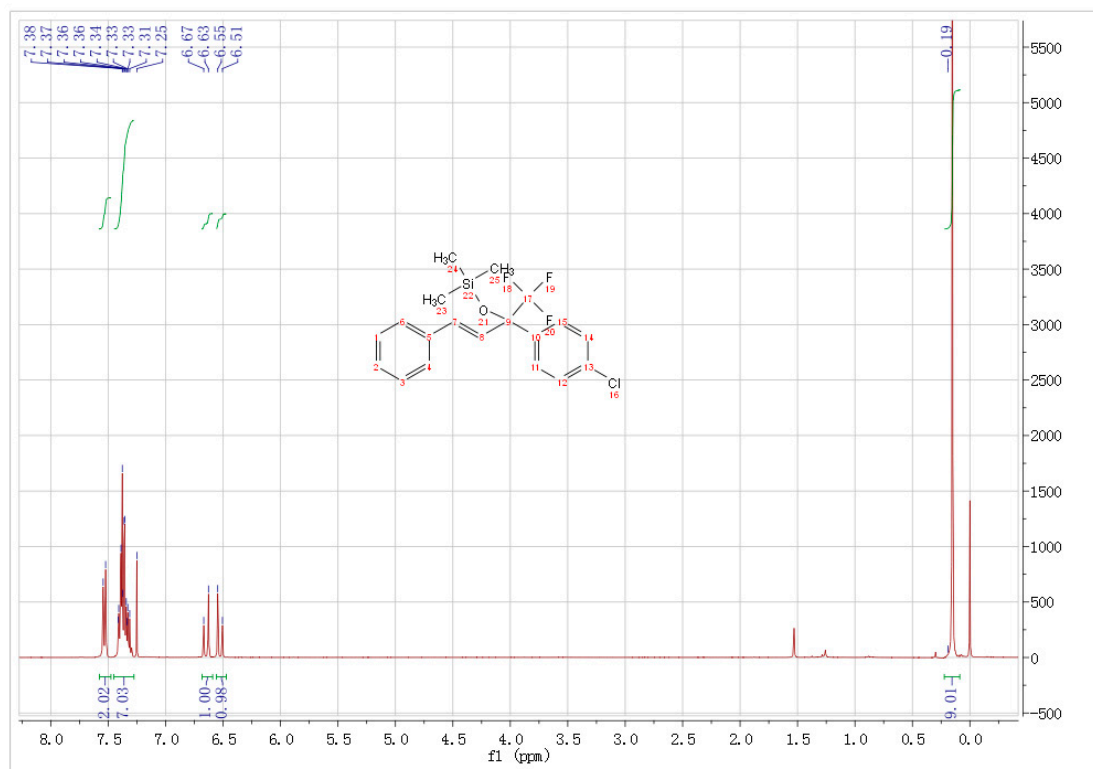

Figure S10  $^{13}\text{C}$  NMR spectra for compound 2e

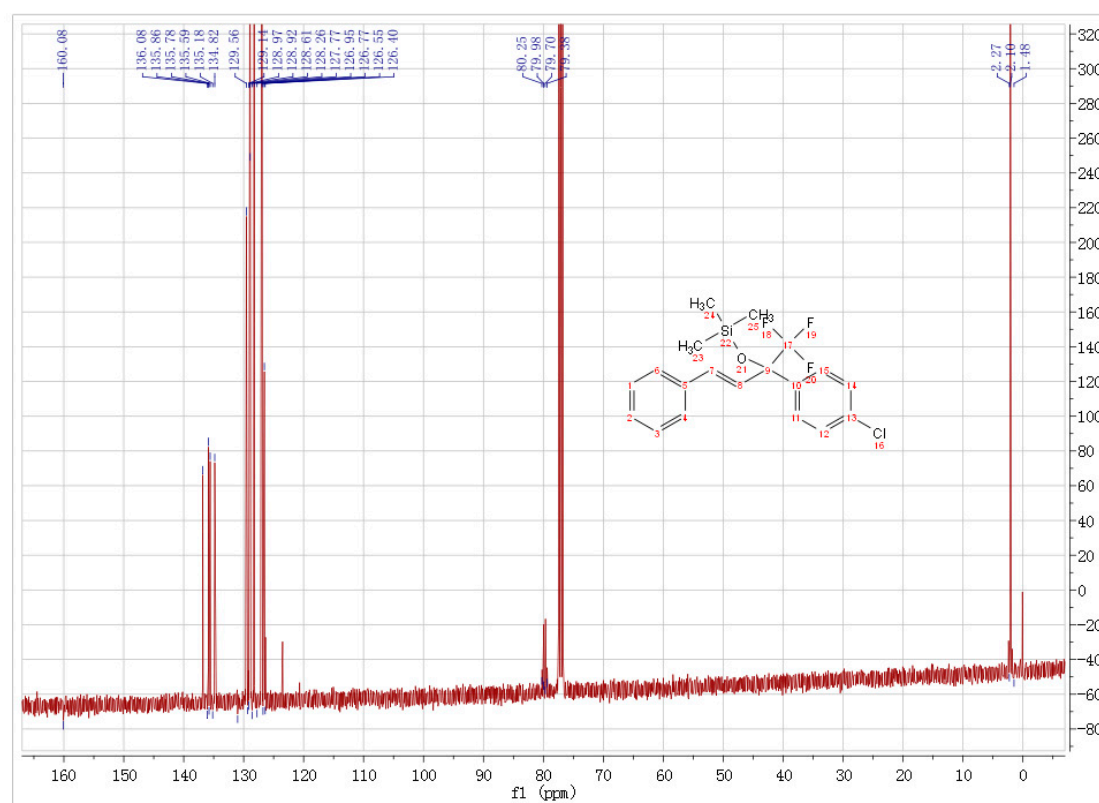

Figure S11  $^1\text{H}$  NMR spectra for compound 2f

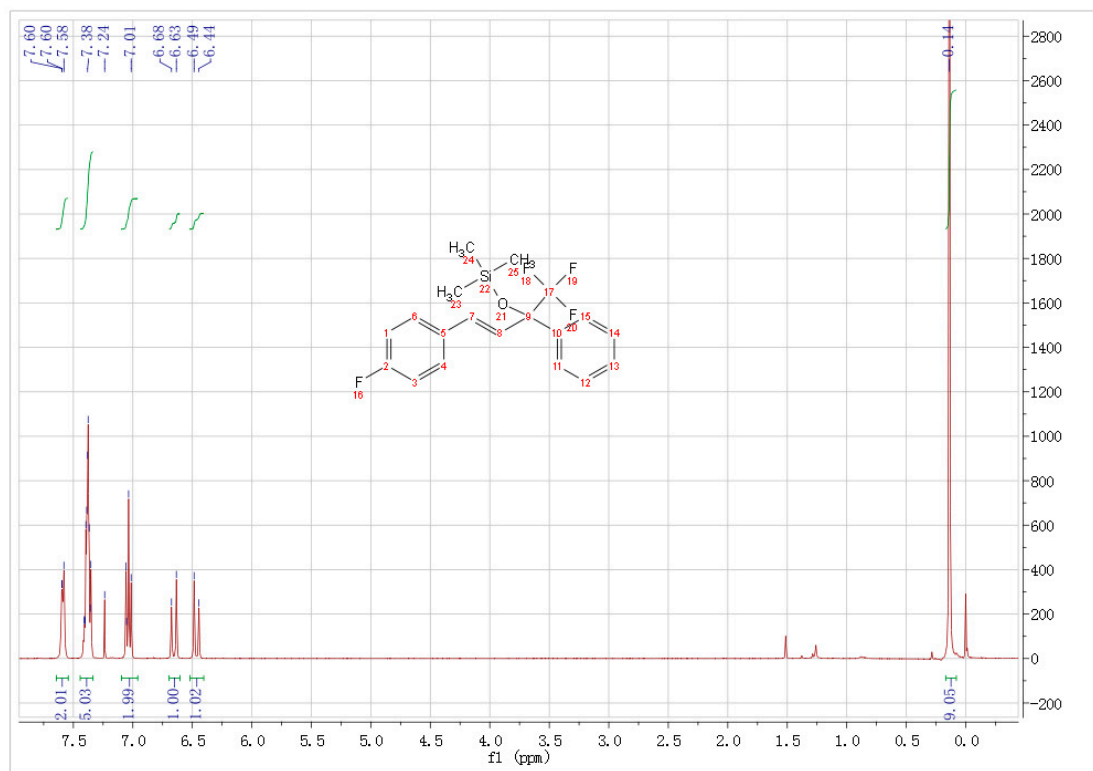

Figure S12  $^{13}\text{C}$  NMR spectra for compound 2f

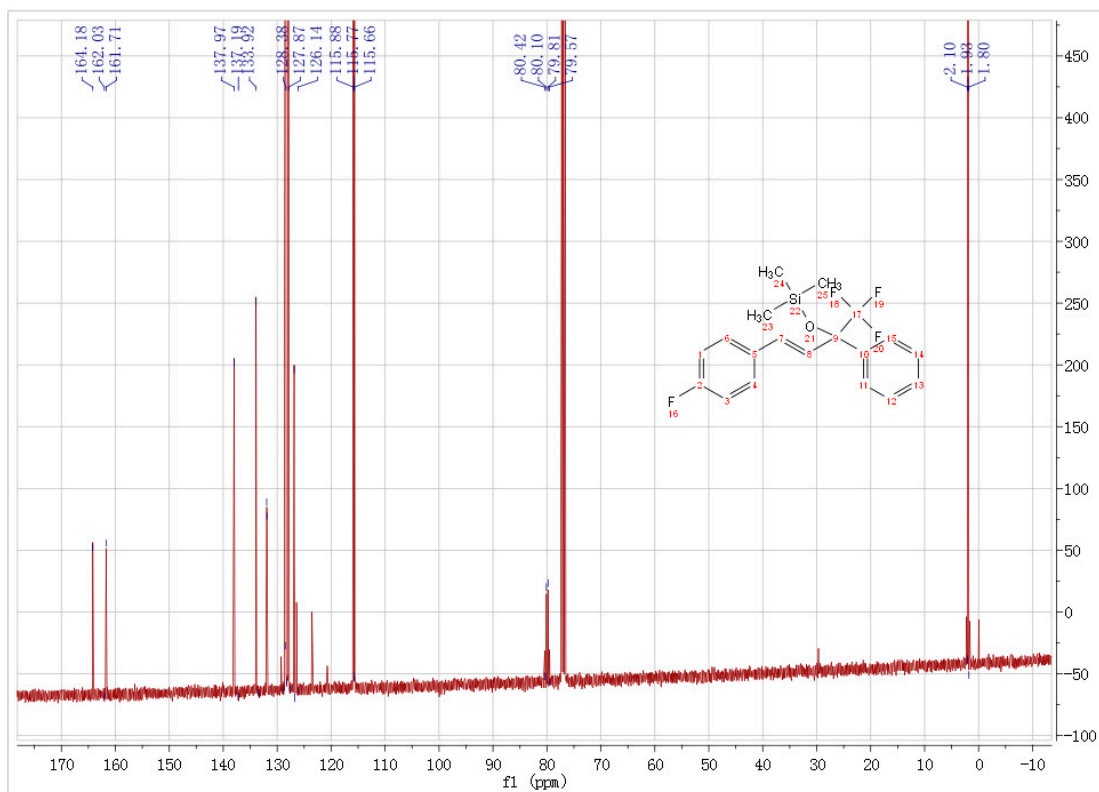

Figure S13  $^{13}\text{C}$  NMR spectra for compound 2g

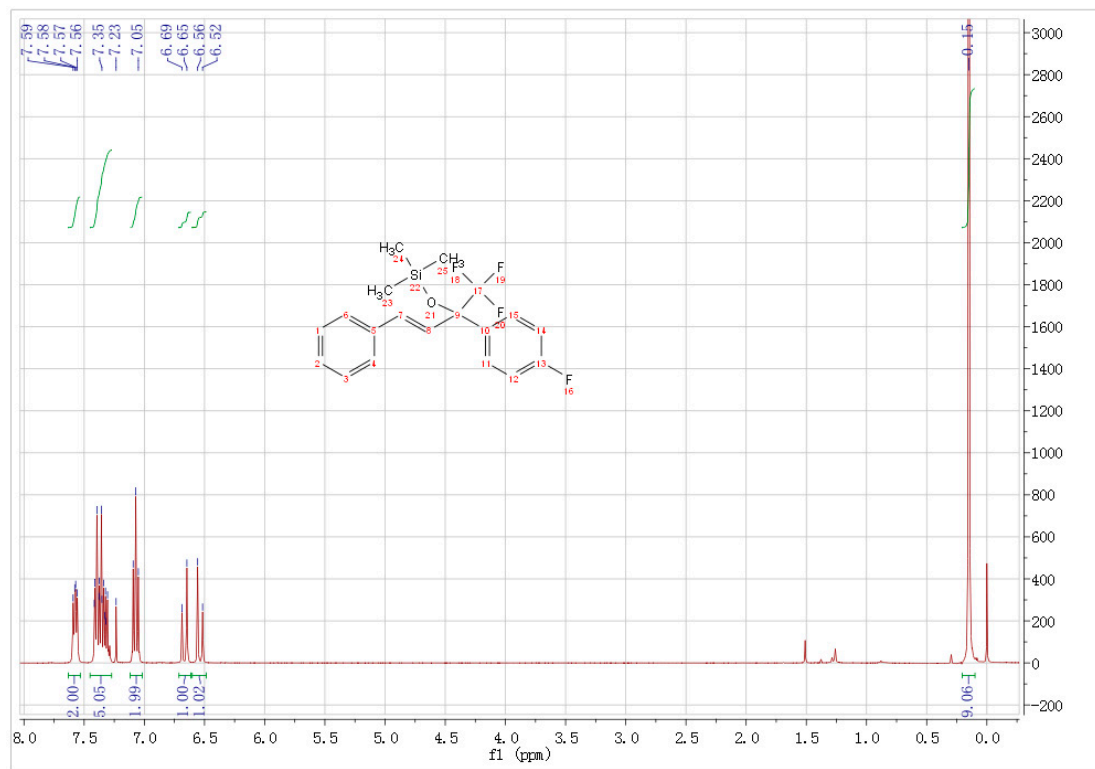

Figure S14  $^{13}\text{C}$  NMR spectra for compound 2g

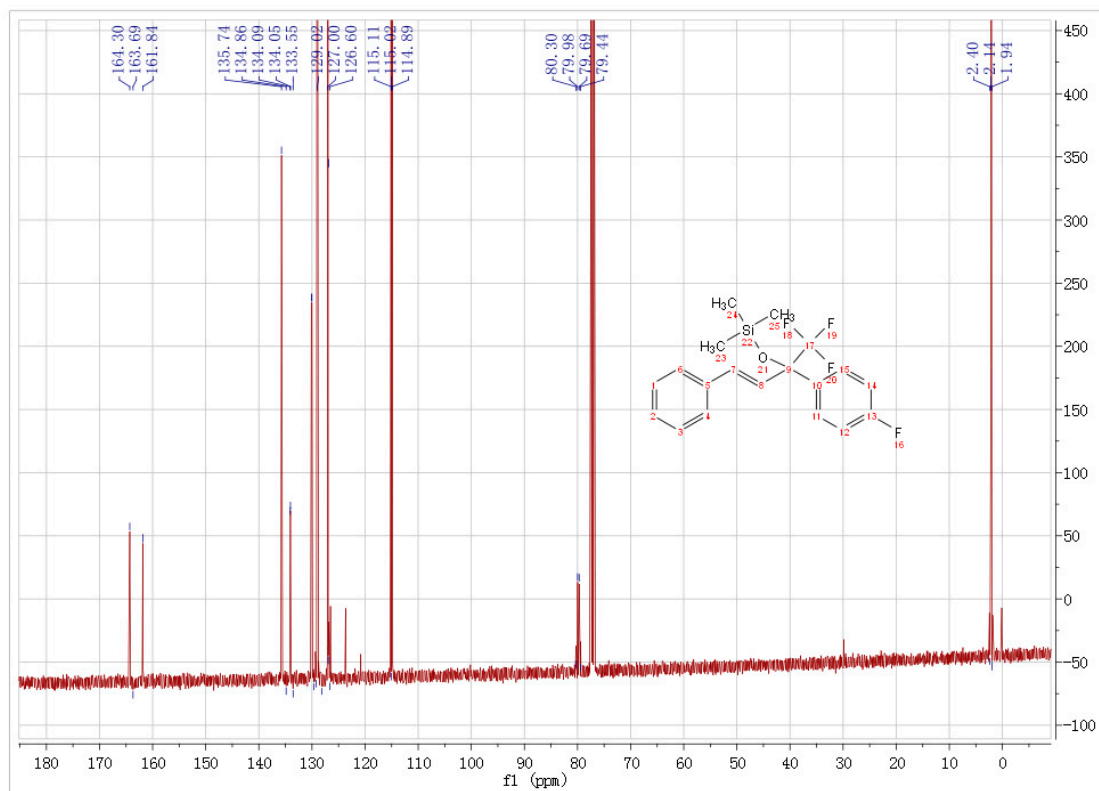

Figure S15  $^1\text{H}$  NMR spectra for compound 2h

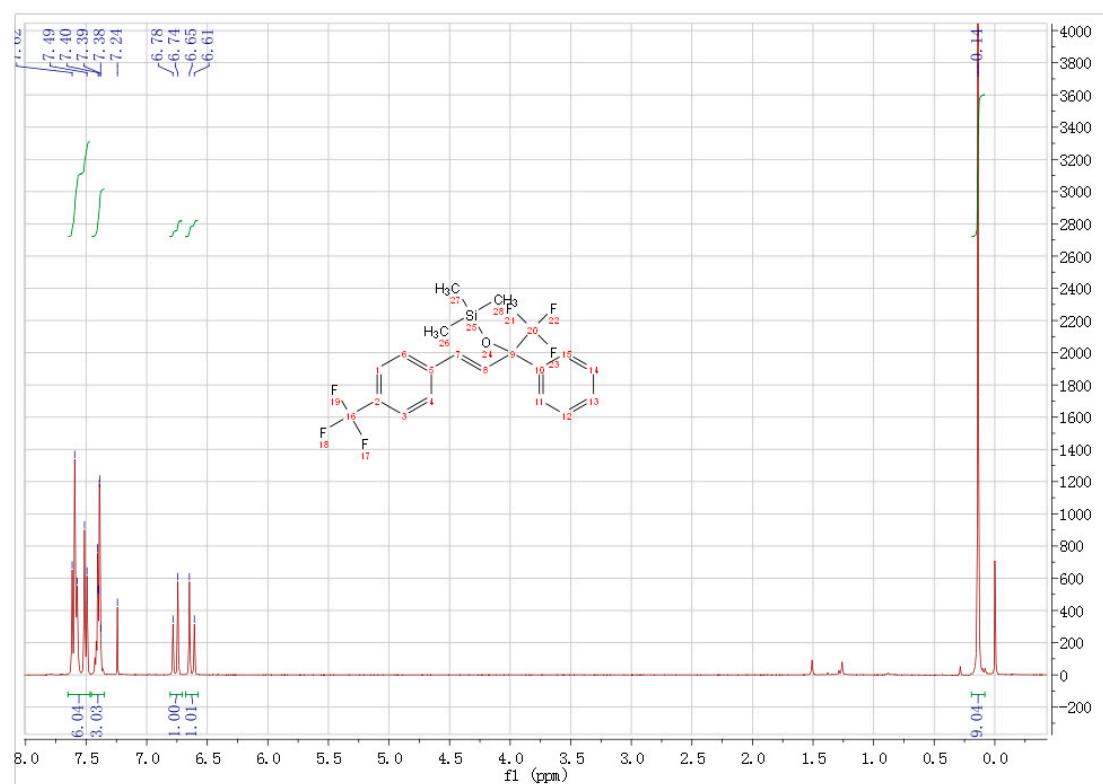

Figure S16  $^{13}\text{C}$  NMR spectra for compound 2h

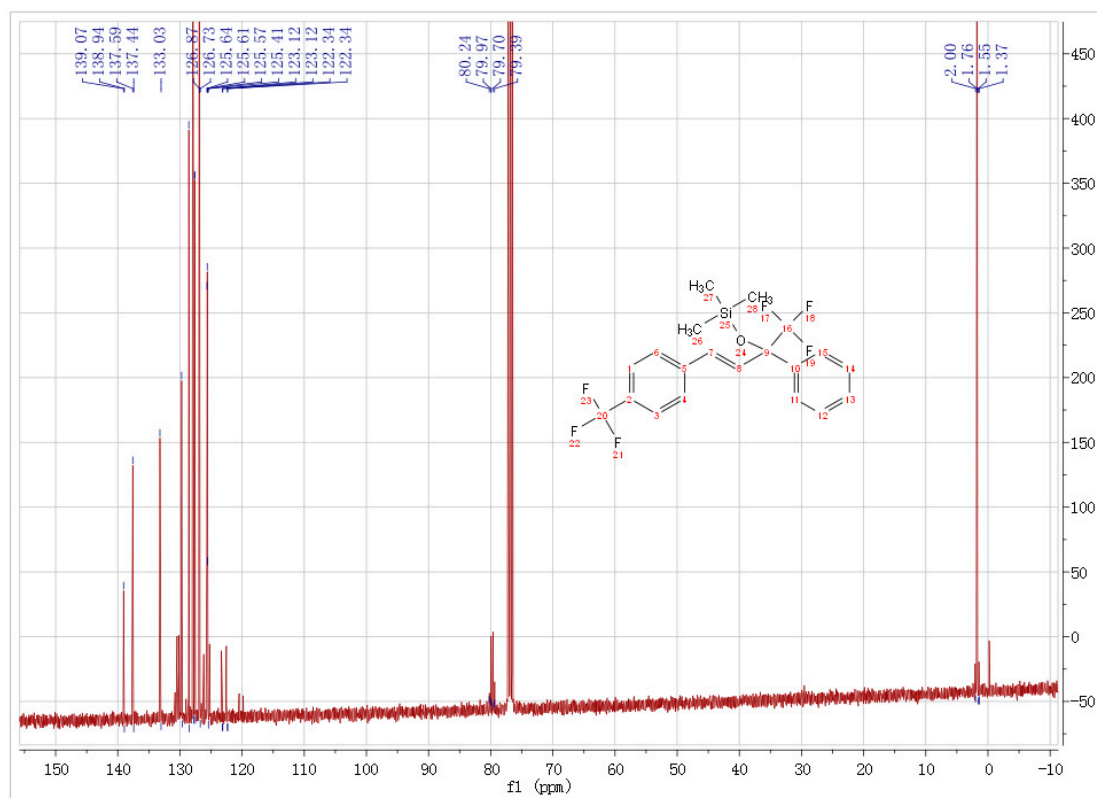

**Chemical structure of 10a:** CC1(C)C(=C2C(=CC=C2)C(=C3C(=C(C=C3)C(F)(F)F)C(F)(F)F)O1)C(F)(F)F

**<sup>1</sup>H NMR spectrum (CDCl<sub>3</sub>):**

| Chemical Shift (ppm)   | Integration      |
|------------------------|------------------|
| 7.73, 7.67, 7.65       | 1.99, 1.97, 5.00 |
| 7.25                   | 1.00             |
| 6.66, 6.61, 6.57, 6.53 | 1.01             |
| 1.5                    | 9.10             |
| 0.17                   | 9.10             |

The <sup>13</sup>C NMR spectrum shows peaks at 142.18, 142.18, 135.90, 135.98, 128.33, 126.91, 126.77, 126.24, 126.10, 125.00, 124.96, 124.94, 124.85, 80.35, 80.05, 79.77, 79.47, -2.05, and -1.81 ppm. The chemical structure of compound 10 is overlaid on the spectrum, with carbon atoms numbered 1 through 28. The structure is a complex organic molecule containing a silicon atom, a fluorine atom, and a trifluoromethyl group.

Figure S19  $^1\text{H}$  NMR spectra for compound 2j

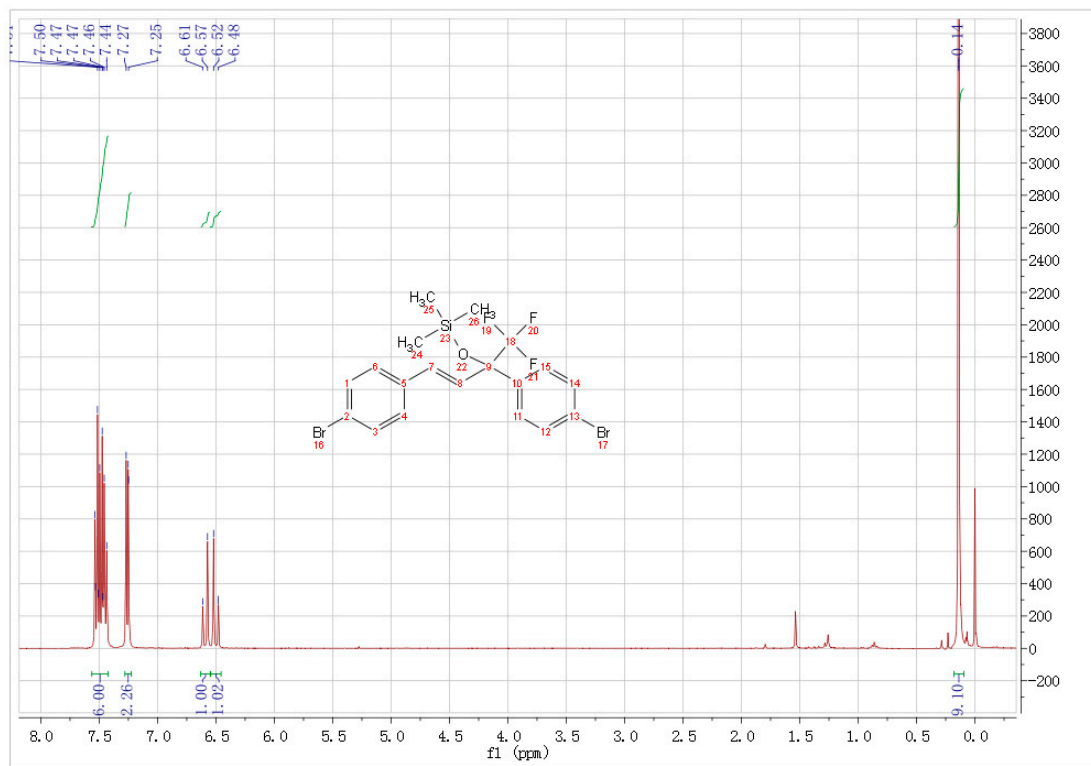

Figure S20  $^{13}\text{C}$  NMR spectra for compound 2j

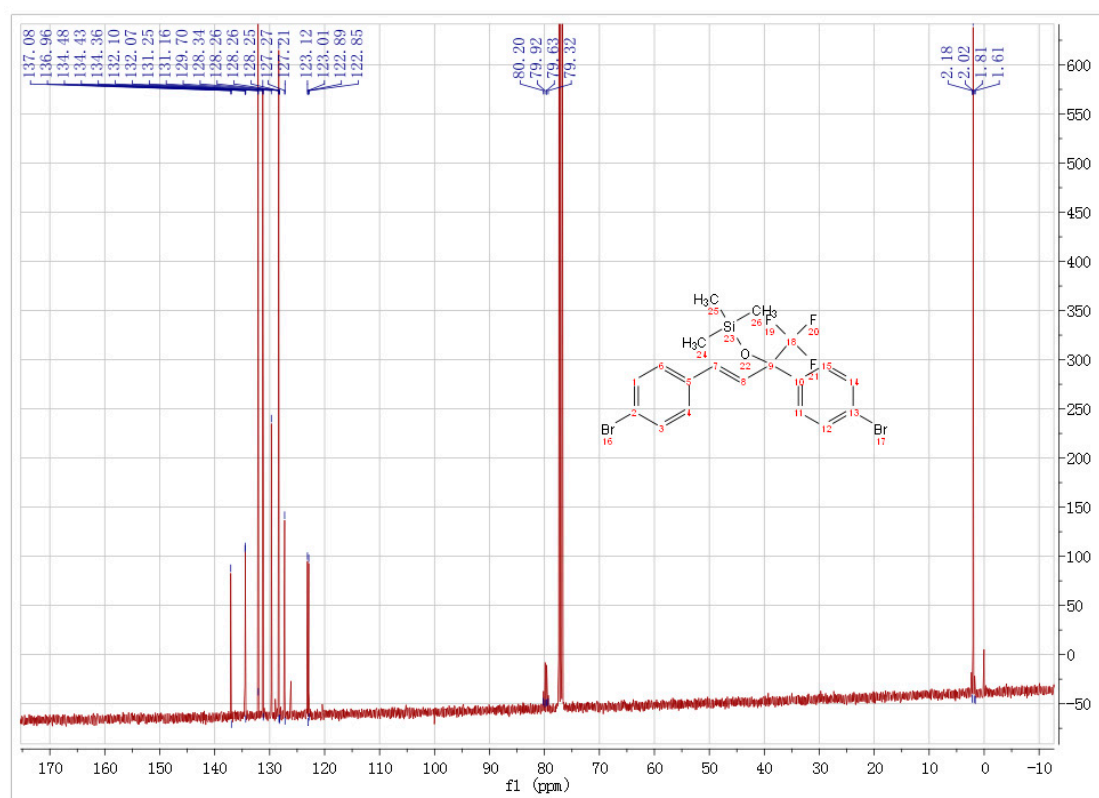

Figure S21  $^1\text{H}$  NMR spectra for compound 2k

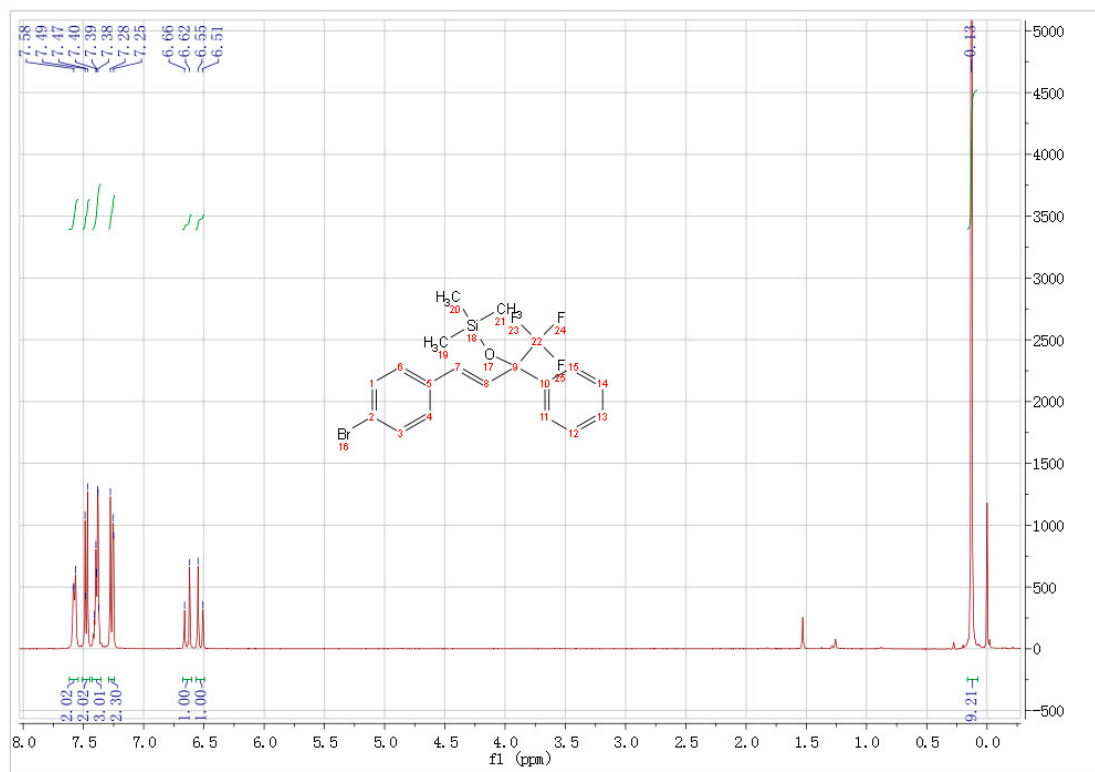

Figure S22  $^{13}\text{C}$  NMR spectra for compound 2k

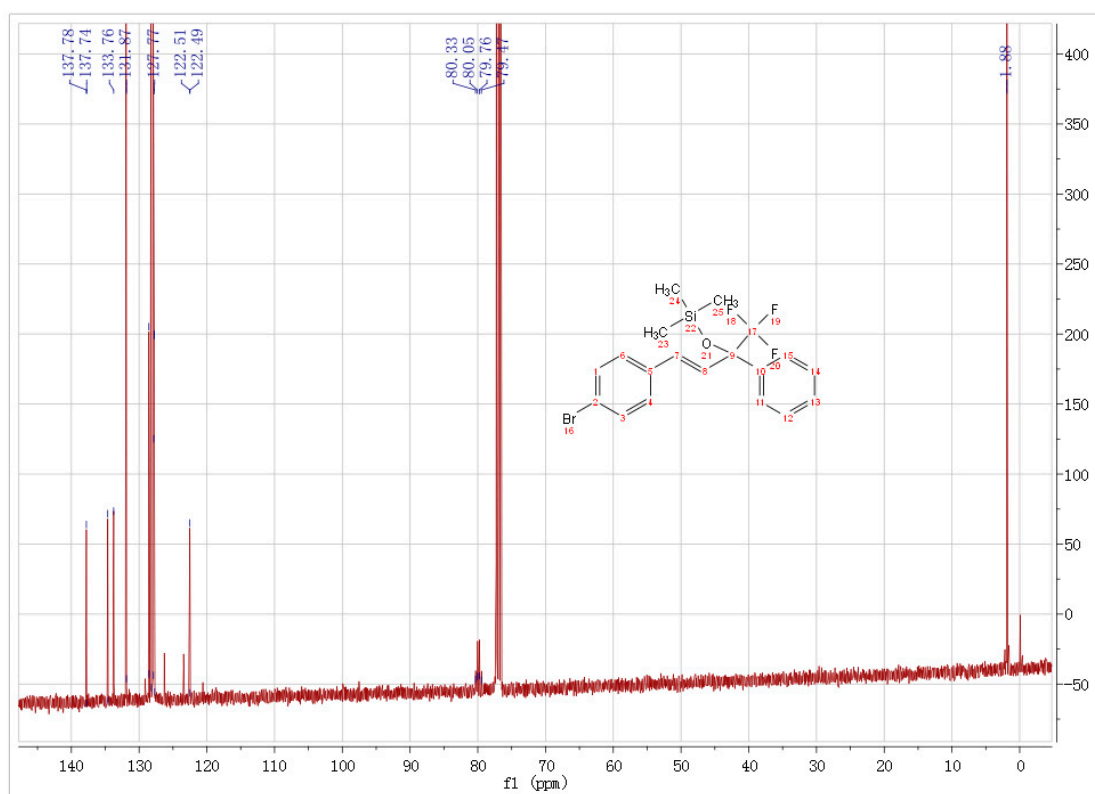



Figure S23  $^1\text{H}$  NMR spectra for compound 2l

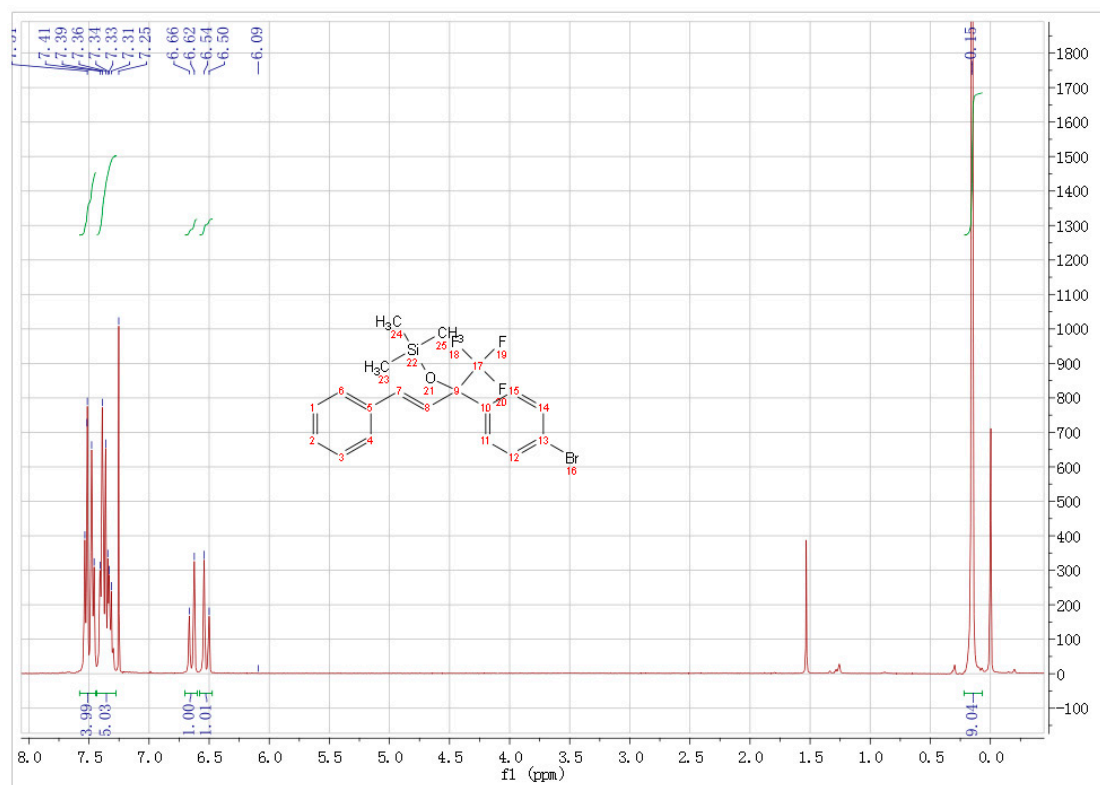

Figure S24  $^{13}\text{C}$  NMR spectra for compound 2l

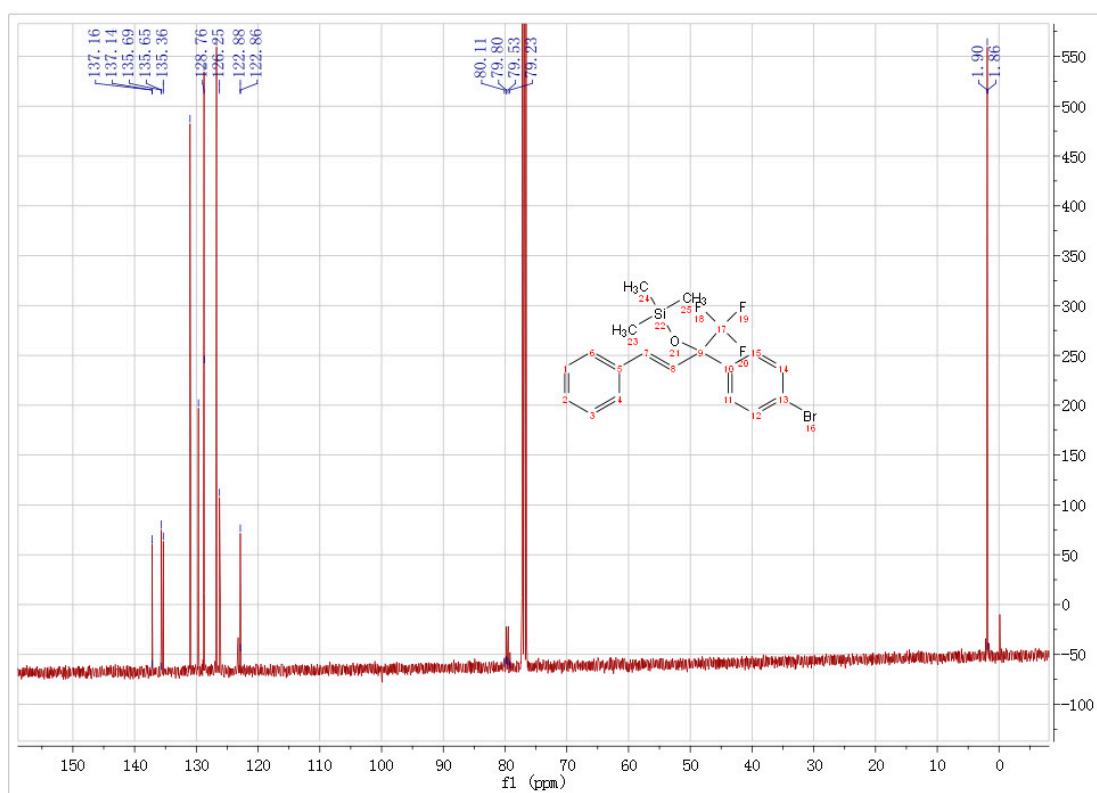

The figure displays the  $^1\text{H}$  NMR spectrum of compound 10, which is a bis-siloxane derivative. The chemical structure of compound 10 is shown above the spectrum, with atoms numbered 1 through 30. The spectrum is recorded in  $\text{CDCl}_3$ , with the solvent peak (triplet) visible at approximately 7.26 ppm. The x-axis represents the chemical shift in ppm, ranging from 0.0 to 8.0. The y-axis represents the intensity in arbitrary units, ranging from 0 to 2100. The spectrum shows several multiplets in the aromatic region (6.5-7.5 ppm) and a large singlet at 0.12 ppm corresponding to the methyl groups. Integration values are provided for the main peaks: 6.01, 8.04, 1.00, 1.01, and 8.99.

Chemical structure of compound 10 (Bis-siloxane derivative) is shown above the spectrum. The structure includes a central silicon atom (Si) bonded to two methyl groups (CH<sub>3</sub>) and two oxygen atoms (O). The oxygen atoms are part of a cyclic siloxane structure. The structure also includes a phenyl ring (C<sub>6</sub>H<sub>5</sub>) and a fluorinated phenyl ring (C<sub>6</sub>H<sub>4</sub>F<sub>2</sub>). The atoms are numbered 1 through 30.

Key peaks and integrations:

- Aromatic region (6.5-7.5 ppm): Multiplets with integrations of 6.01, 8.04, 1.00, and 1.01.
- Solvent peak (7.26 ppm): Triplet, integration of 8.99.
- Methyl groups (0.12 ppm): Large singlet, integration of 8.99.

138.44  
138.44  
136.03  
136.03  
136.81  
136.49  
125.92  
125.52  
125.50  
125.47  
125.43  
125.26  
125.21  
124.97  
124.94

78.44  
78.13  
77.91  
77.65

0.00  
0.20

Chemical structure of 10a is shown in the upper right, with atoms numbered 1 through 29.

Figure S27  $^1\text{H}$  NMR spectra for compound 2n

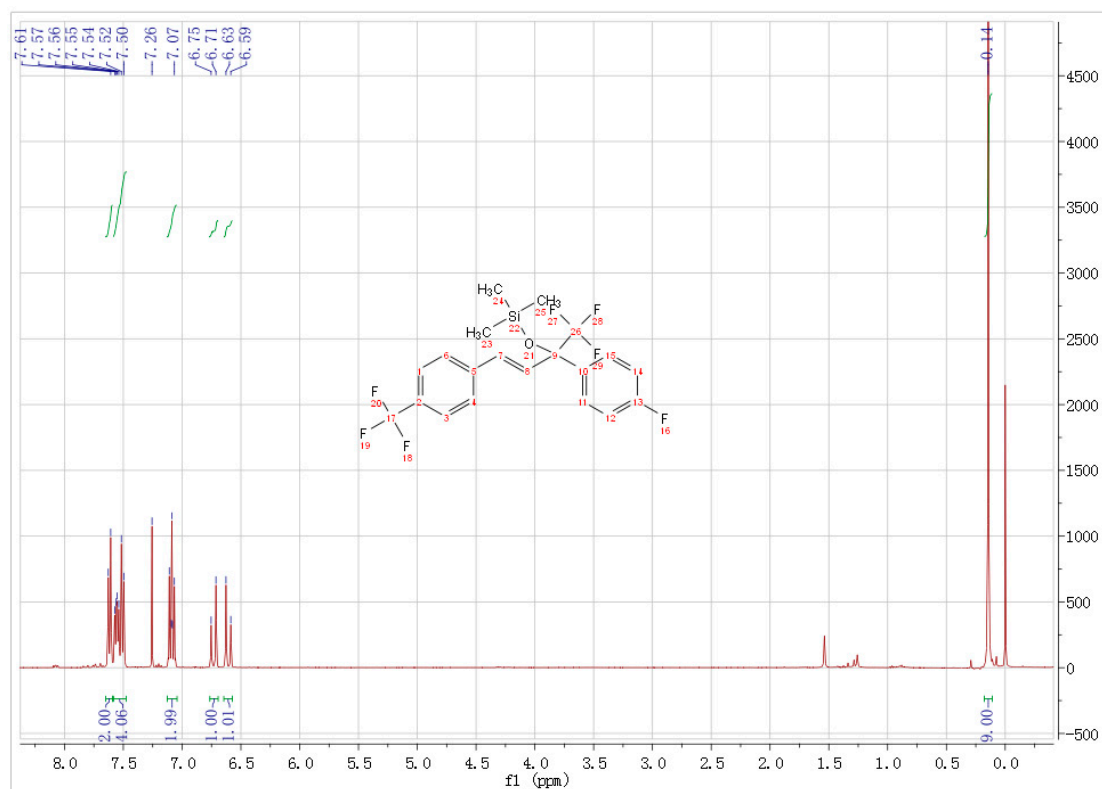

Figure S28  $^{13}\text{C}$  NMR spectra for compound 2n

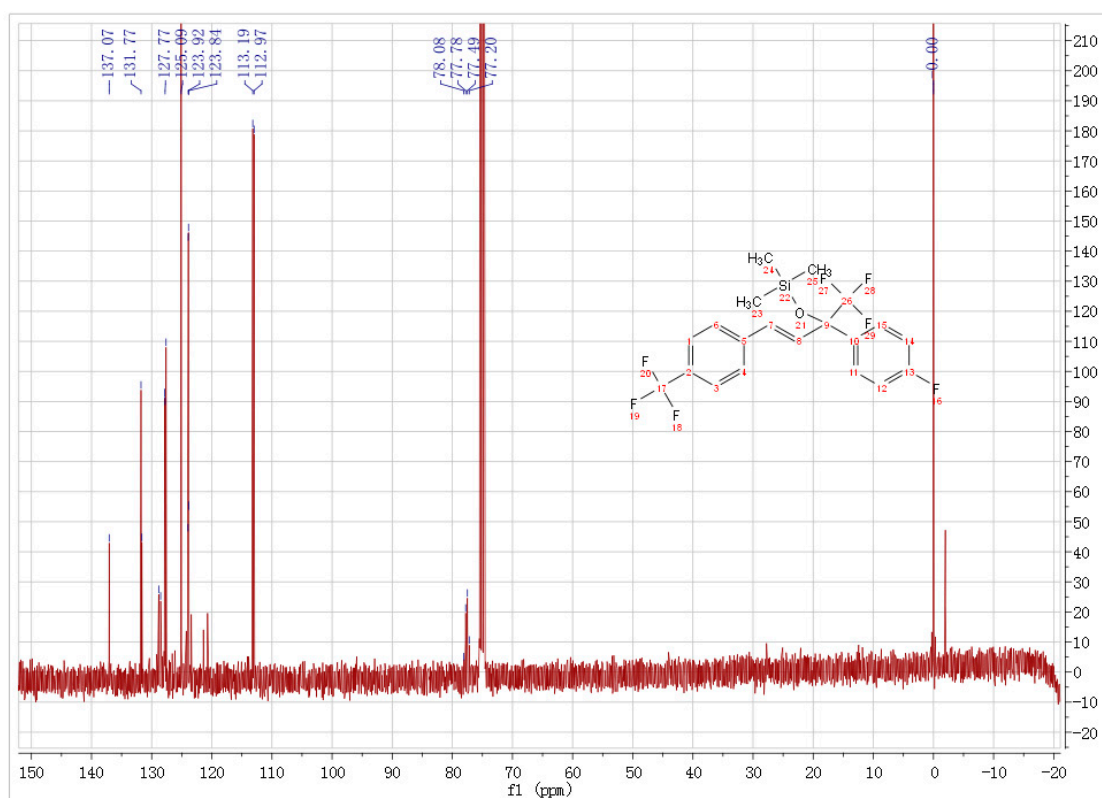

Figure S29  $^1\text{H}$  NMR spectra for compound 2o

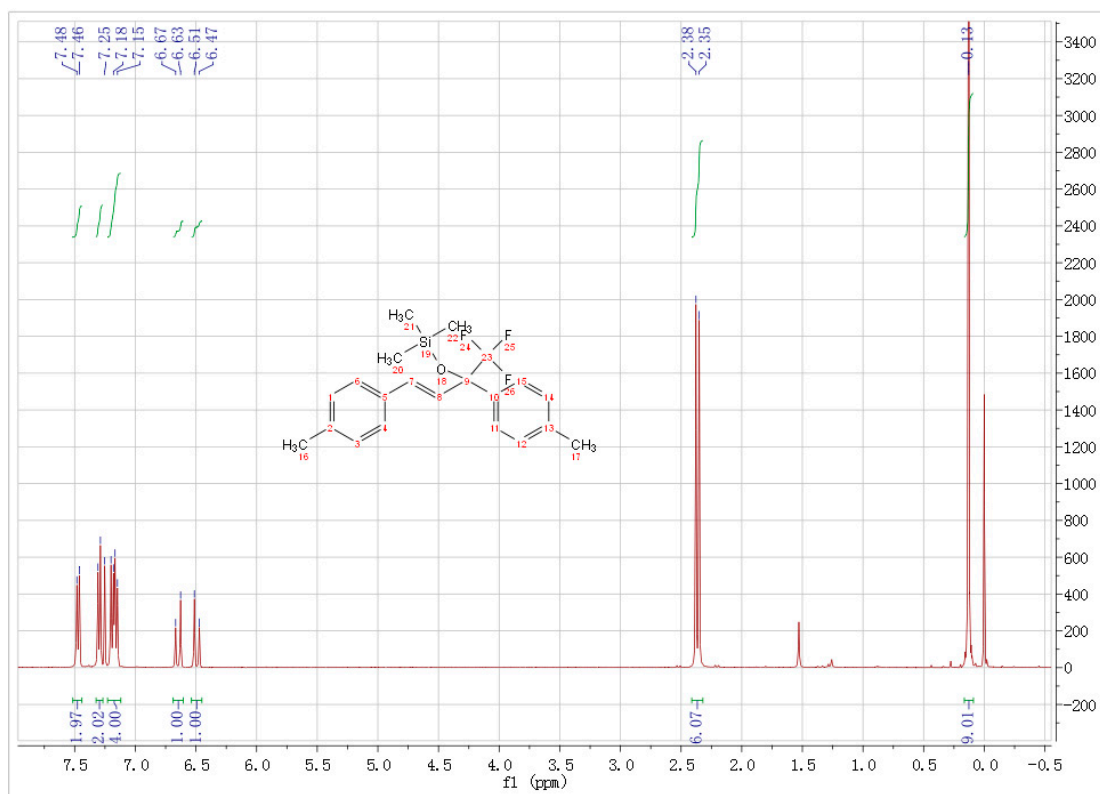

Figure S30  $^{13}\text{C}$  NMR spectra for compound 2o

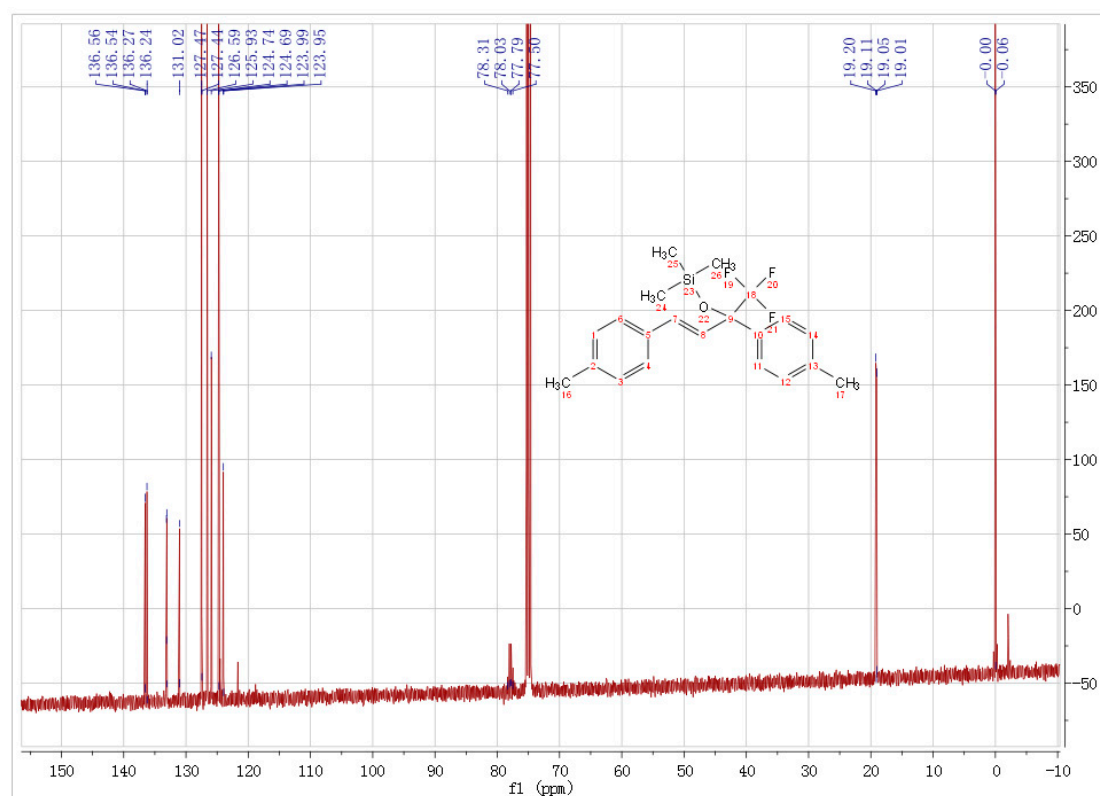

Figure S31  $^1\text{H}$  NMR spectra for compound 2p

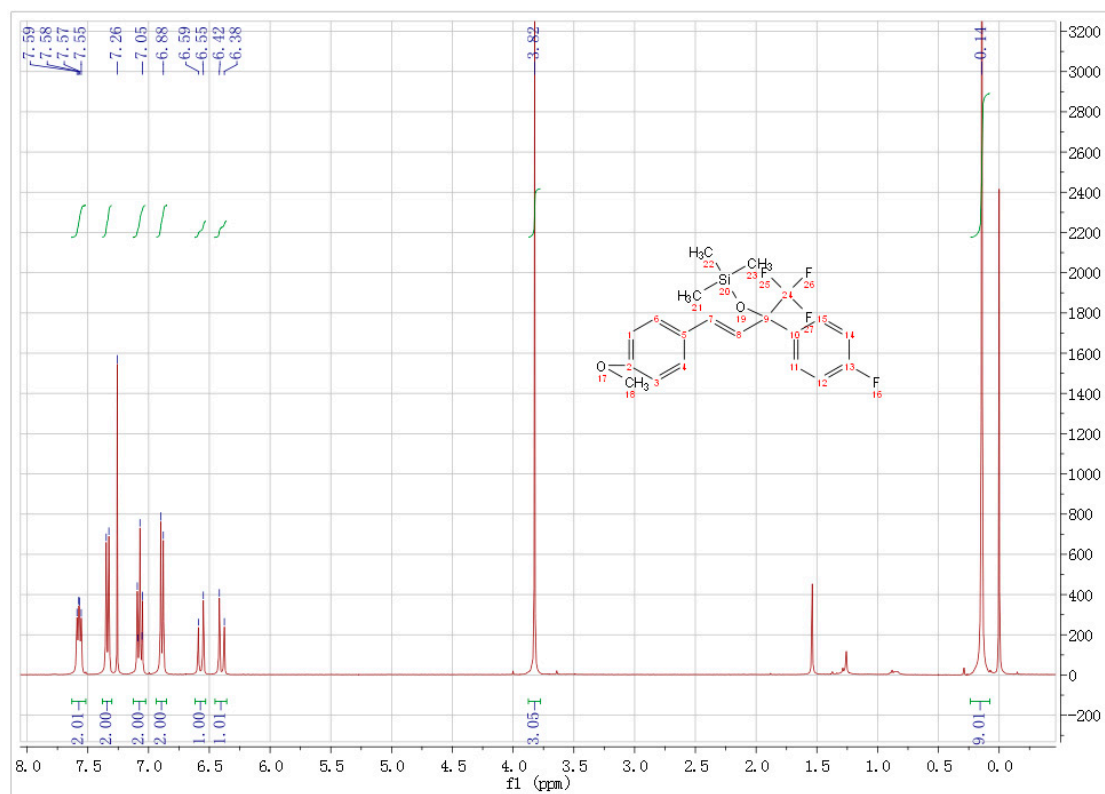

Figure S32  $^{13}\text{C}$  NMR spectra for compound 2p

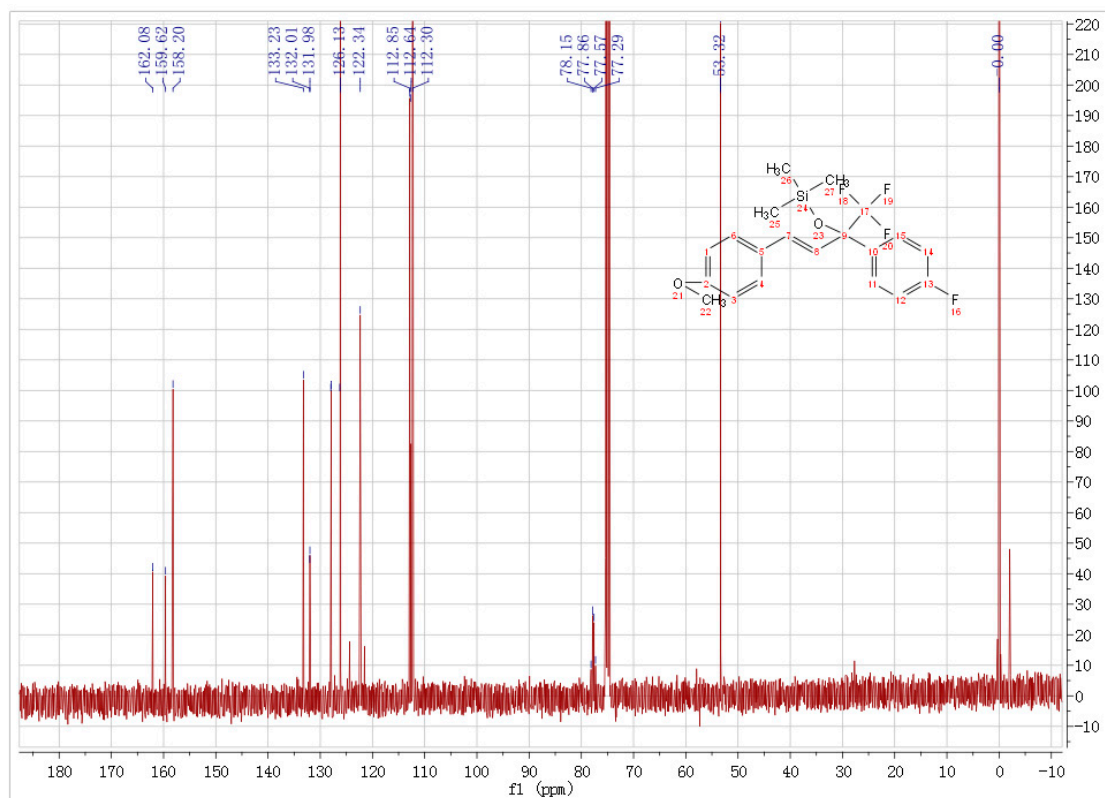

Figure S33  $^1\text{H}$  NMR spectra for compound 2q

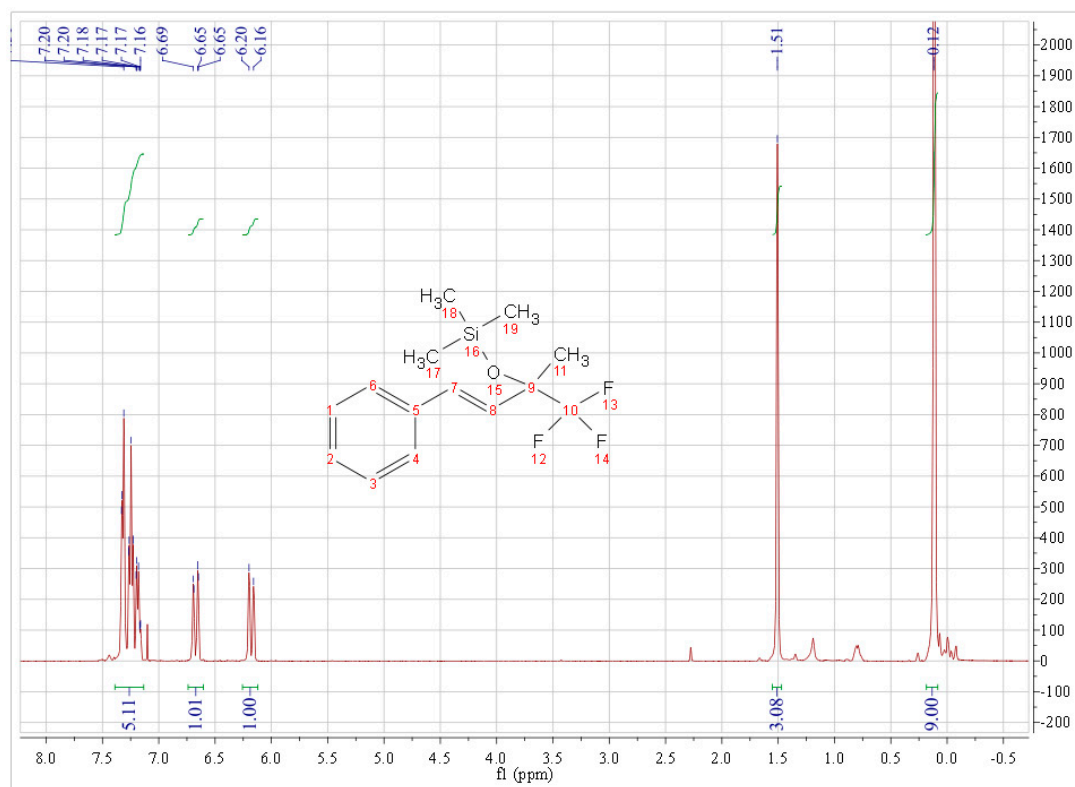

Figure S34  $^{13}\text{C}$  NMR spectra for compound 2q

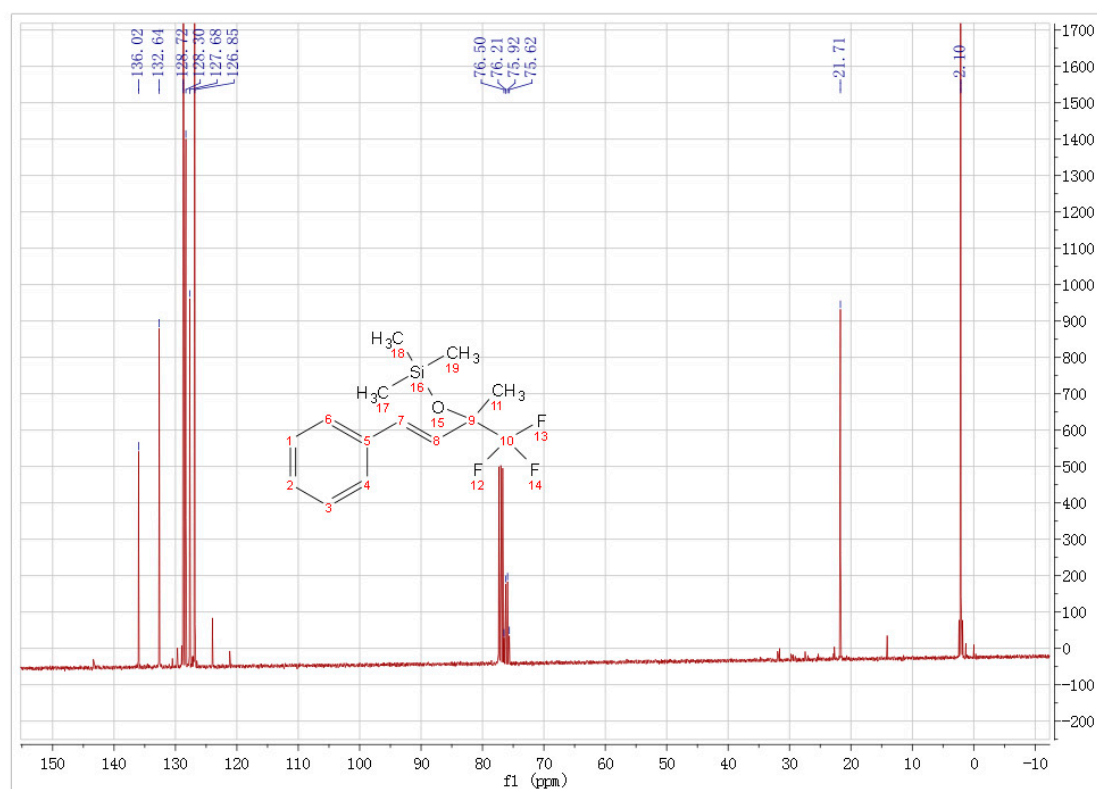

Figure S35  $^1\text{H}$  NMR spectra for compound 2r

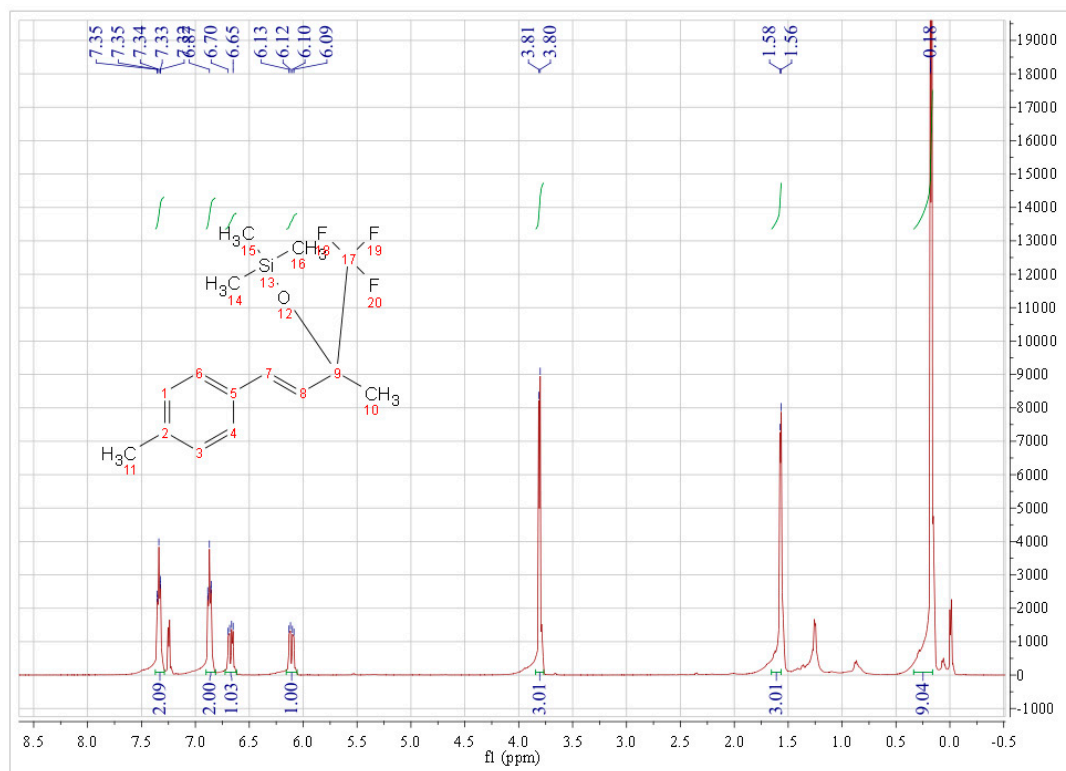

Figure S36  $^{13}\text{C}$  NMR spectra for compound 2r

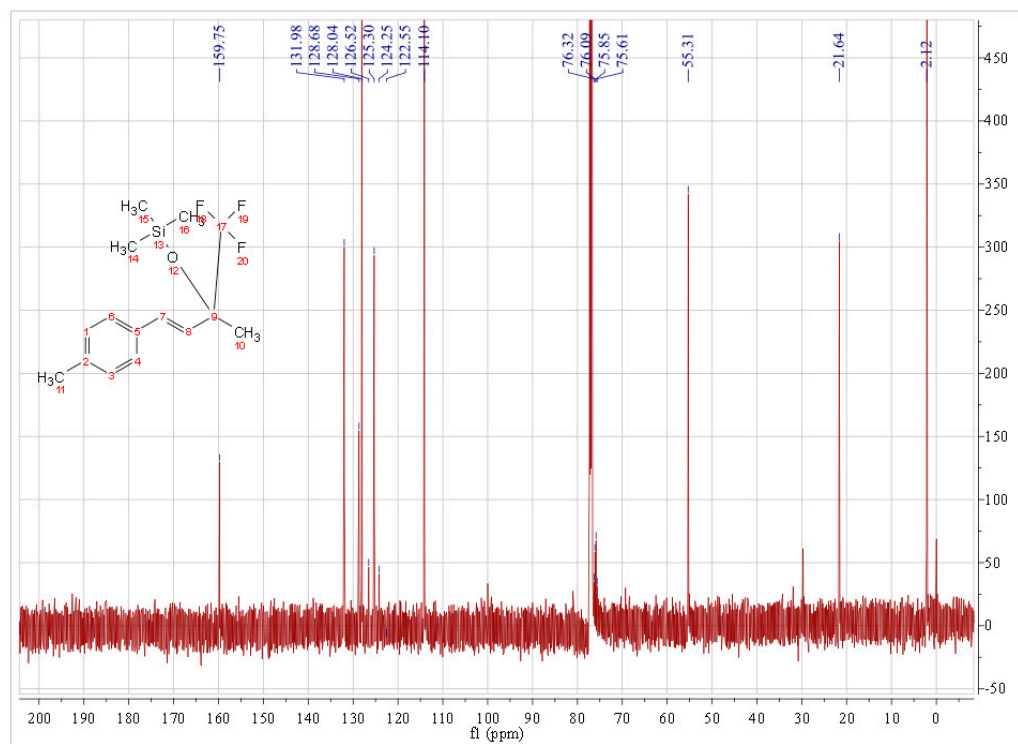



Figure S37  $^1\text{H}$  NMR spectra for compound 2s

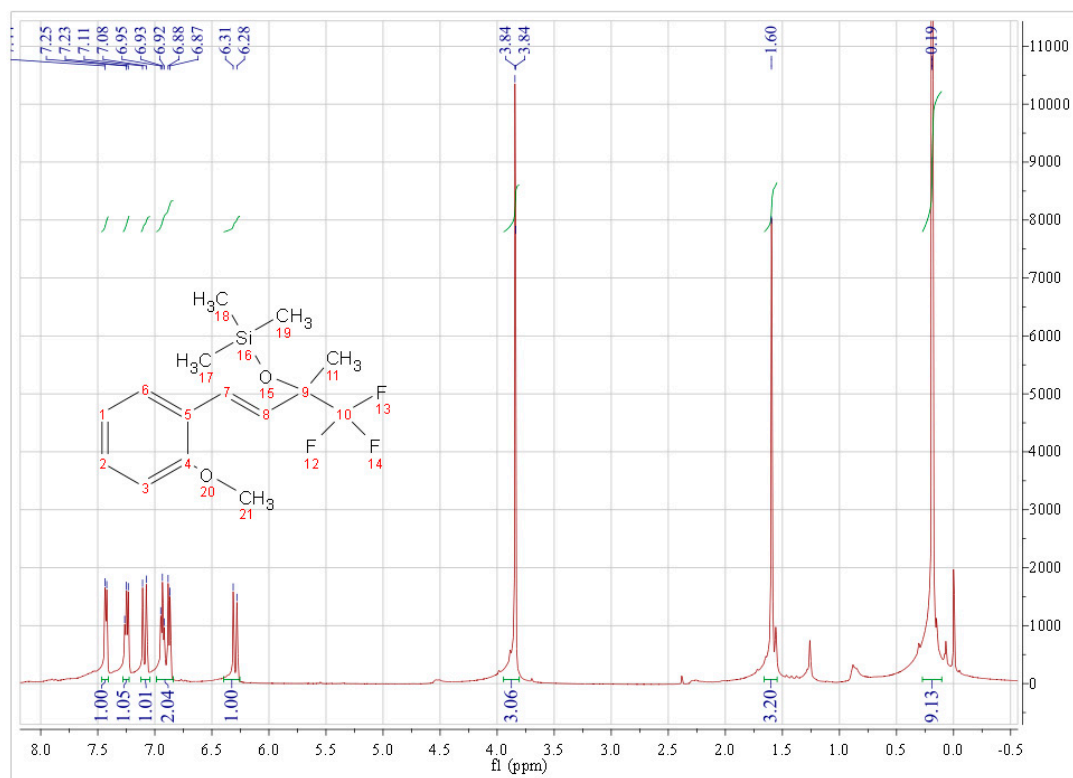

Figure S38  $^{13}\text{C}$  NMR spectra for compound 2s

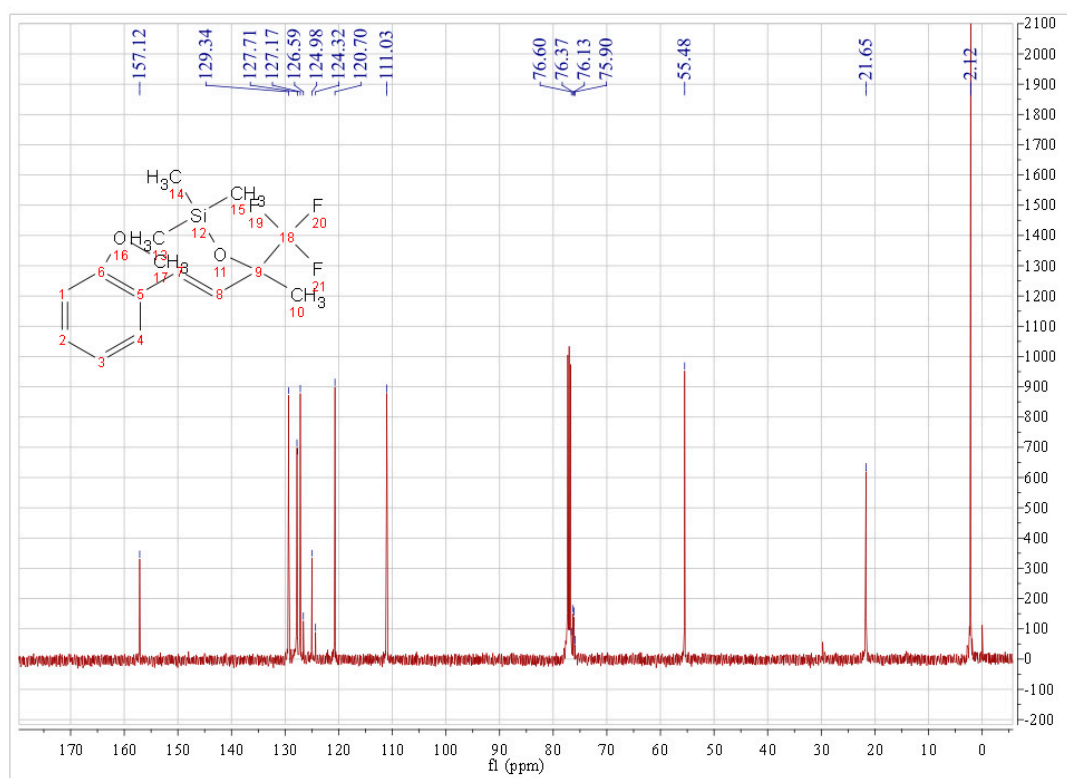



Figure S39  $^1\text{H}$  NMR spectra for compound 2t

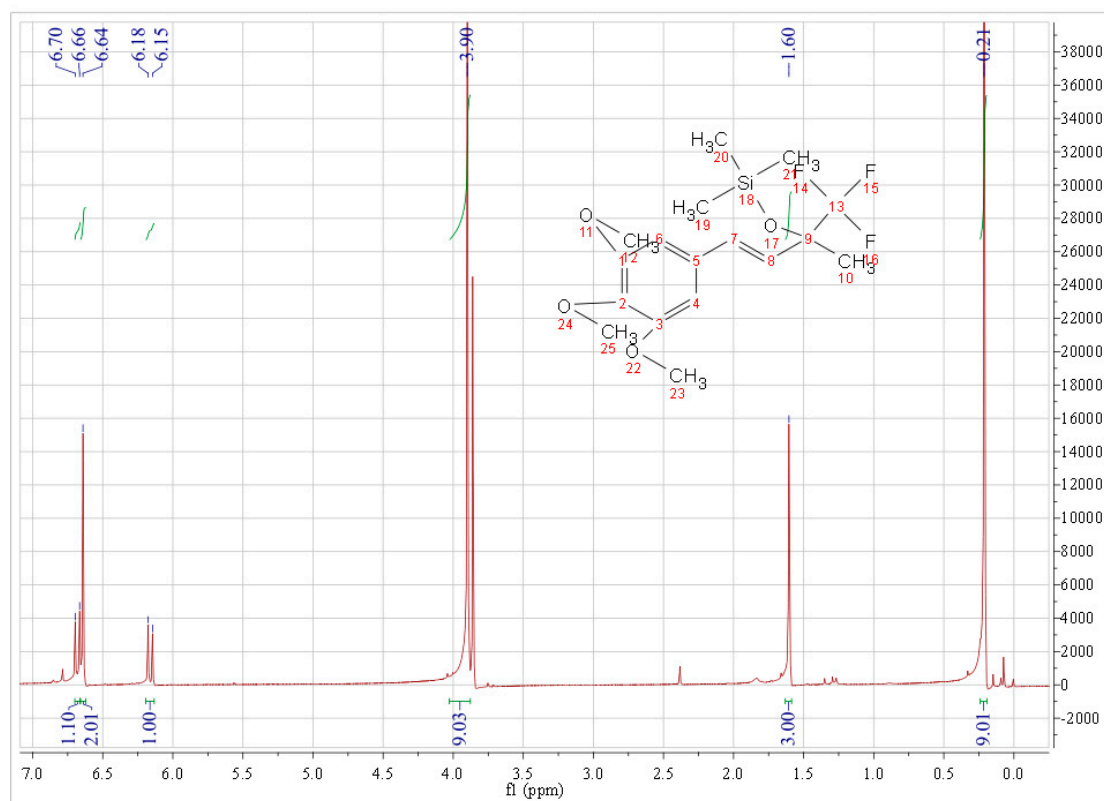

Figure S40  $^{13}\text{C}$  NMR spectra for compound 2t

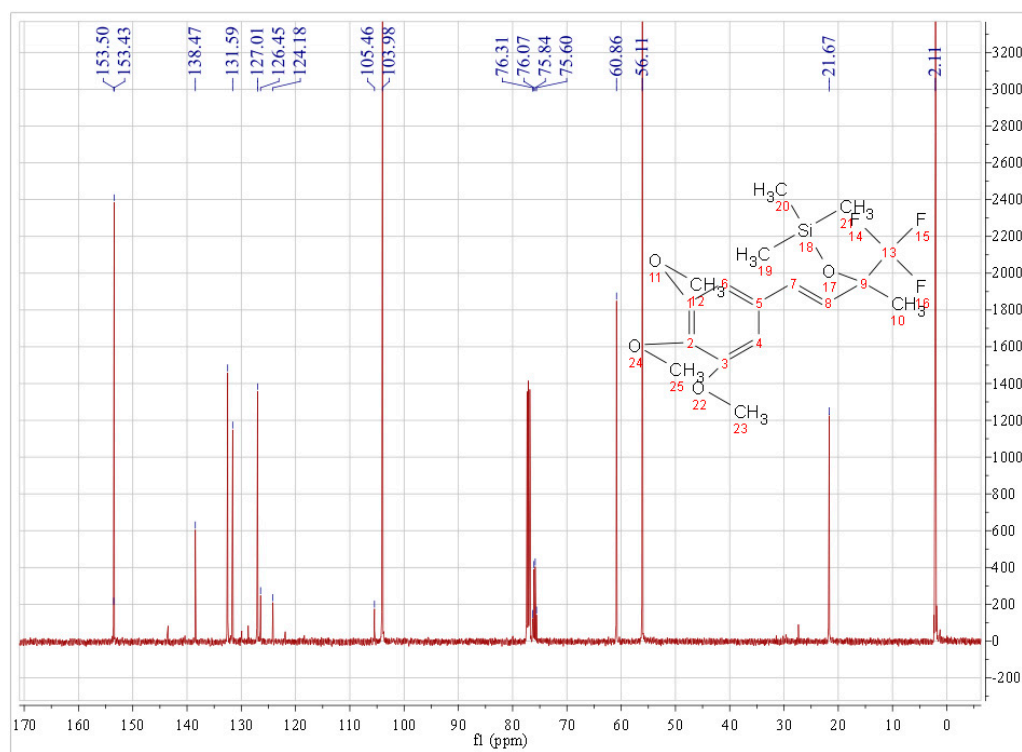

Figure S41  $^1\text{H}$  NMR spectra for compound 2u

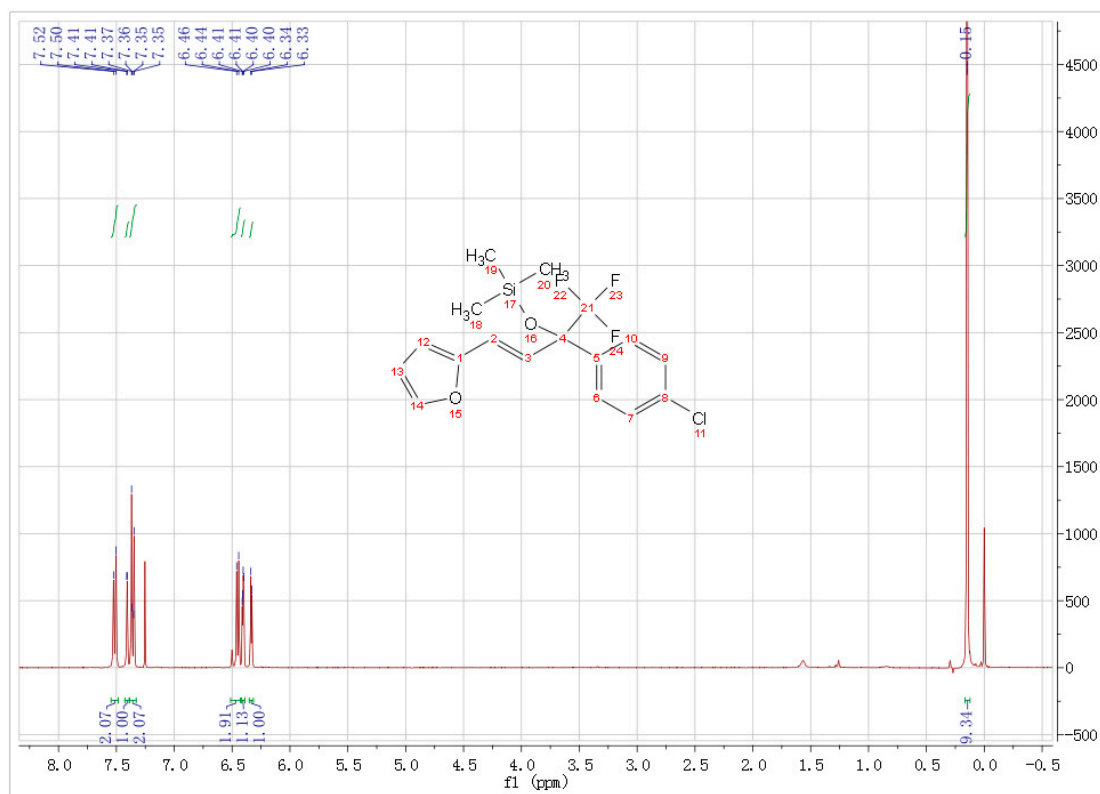

Figure S42  $^{13}\text{C}$  NMR spectra for compound 2u

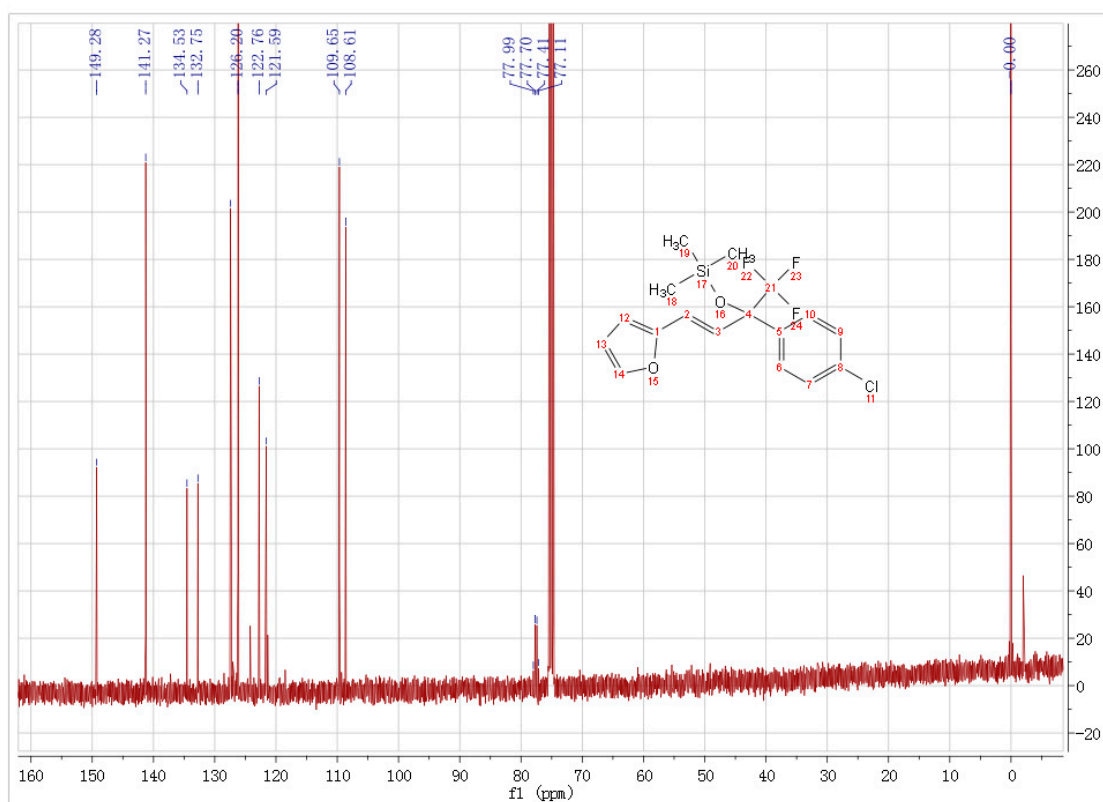

Figure S43  $^1\text{H}$  NMR spectra for compound 2v

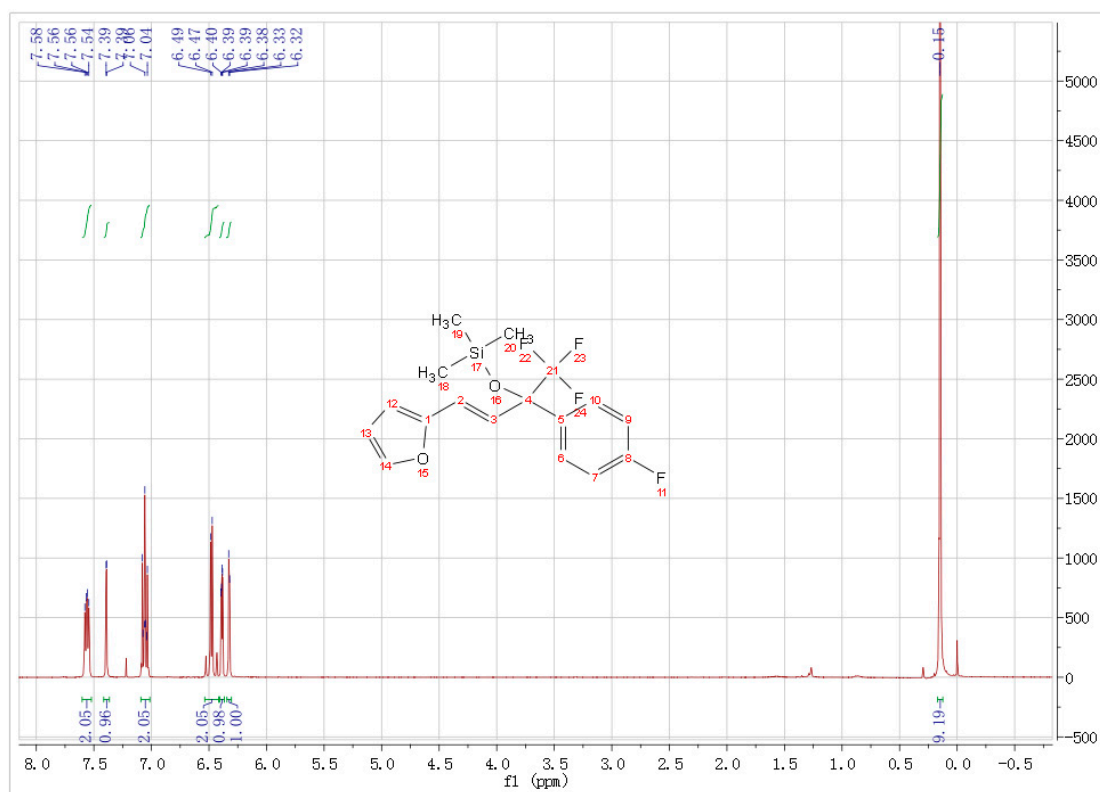

Figure S44  $^{13}\text{C}$  NMR spectra for compound 2v

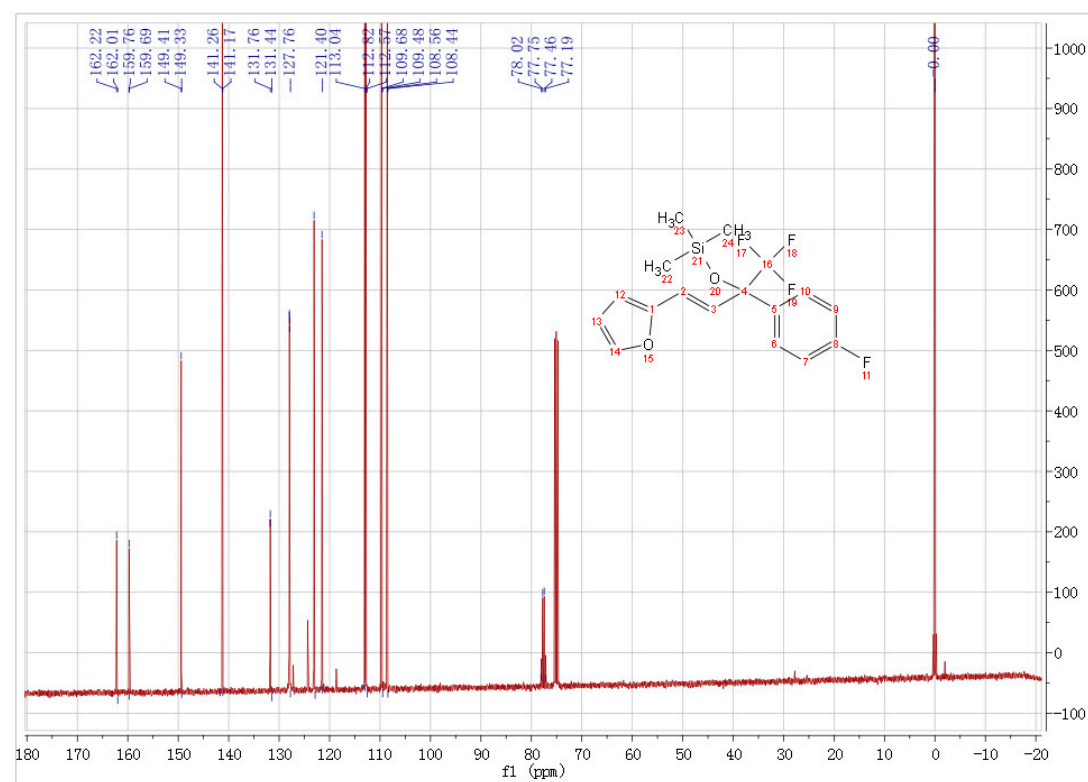

Figure S45  $^1\text{H}$  NMR spectra for compound 2w

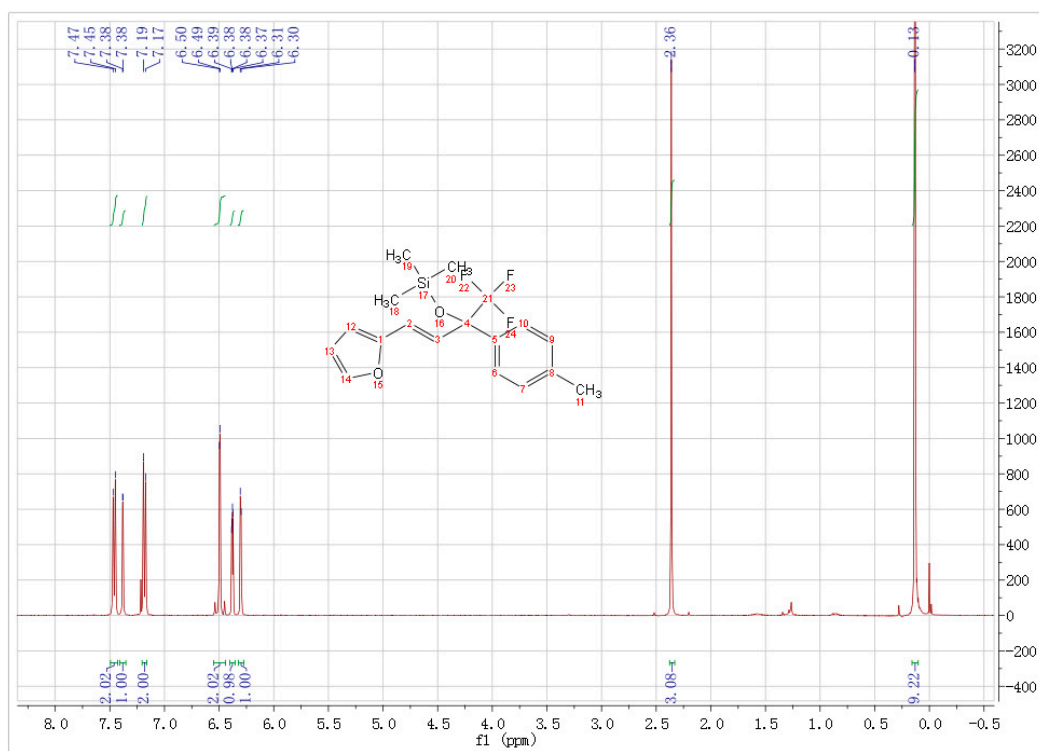

Figure S46  $^{13}\text{C}$  NMR spectra for compound 2w

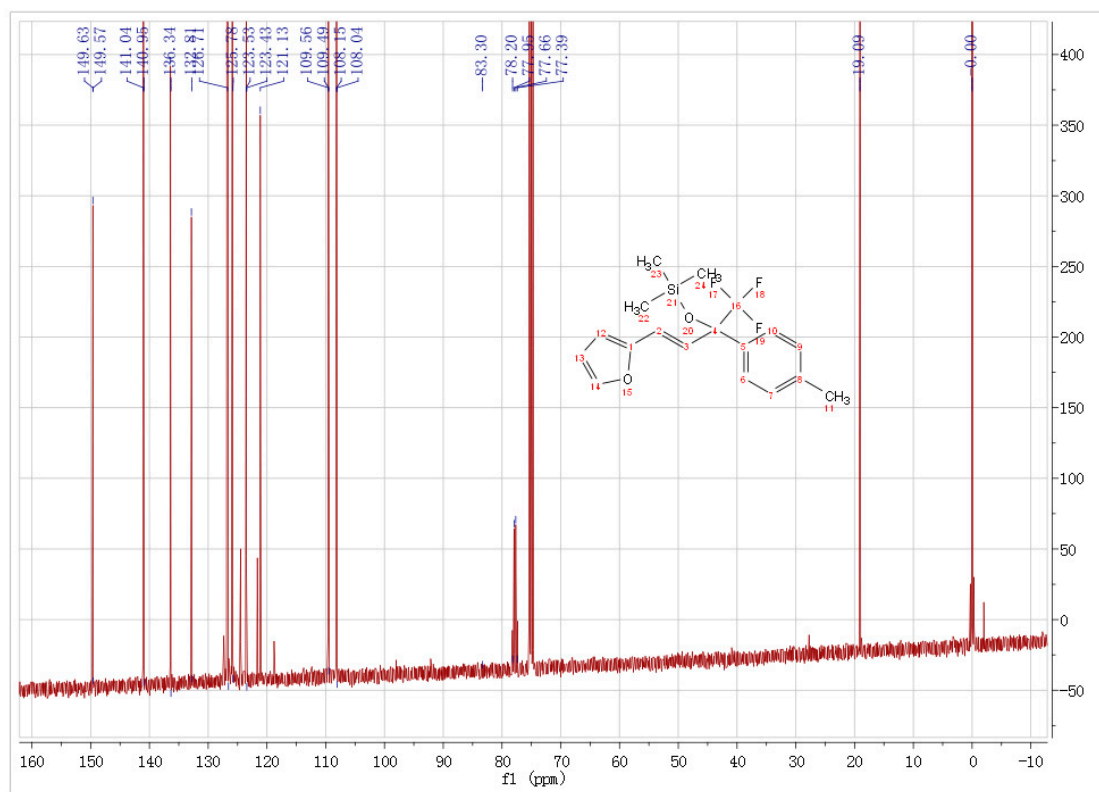

Figure S47  $^1\text{H}$  NMR spectra for compound 5a

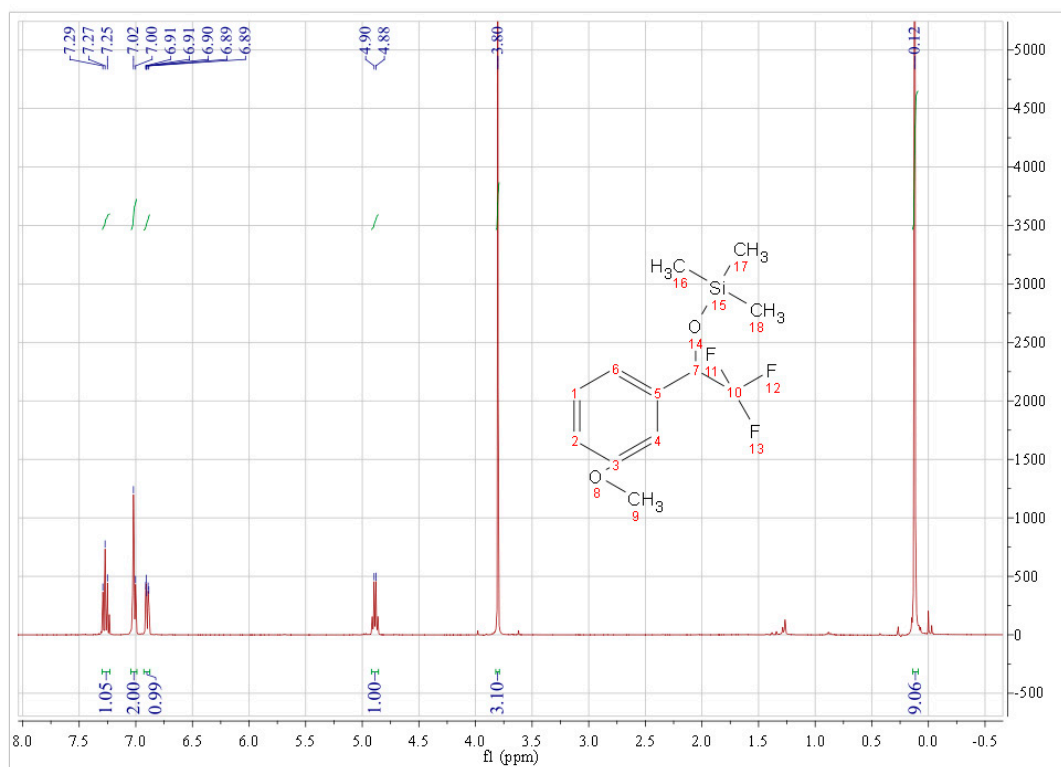

Figure S48  $^{13}\text{C}$  NMR spectra for compound 5a

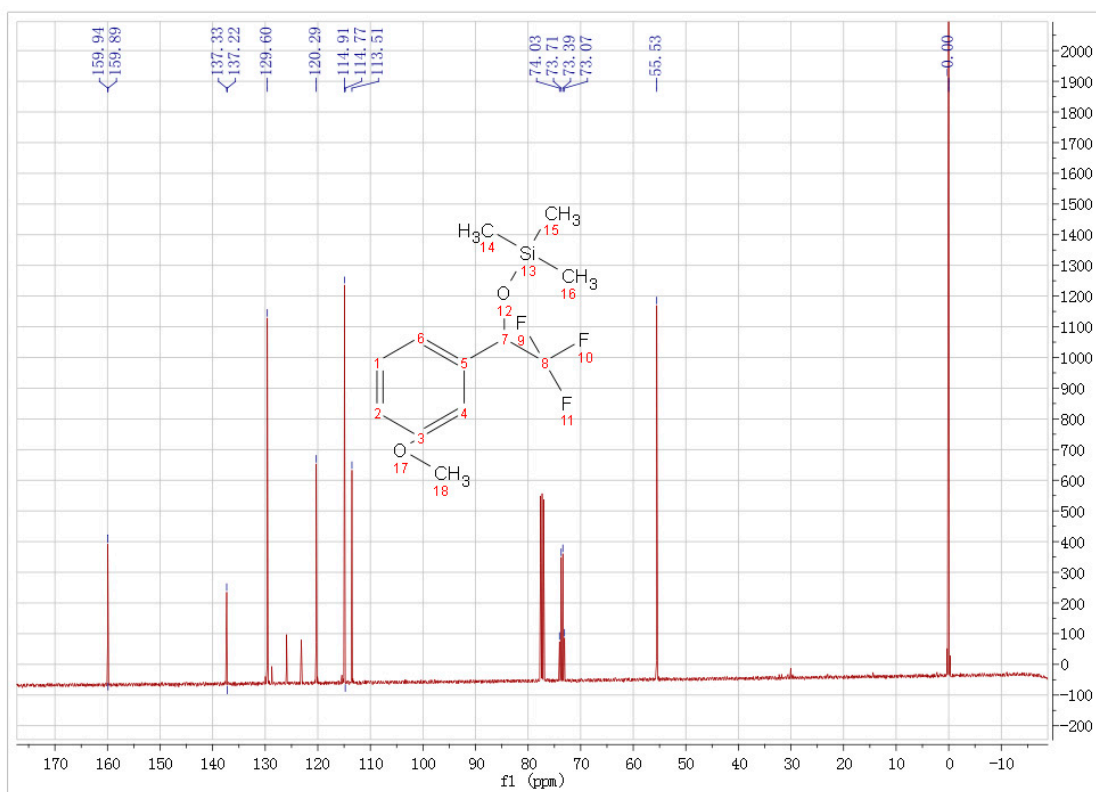

Figure S49  $^1\text{H}$  NMR spectra for compound 5b

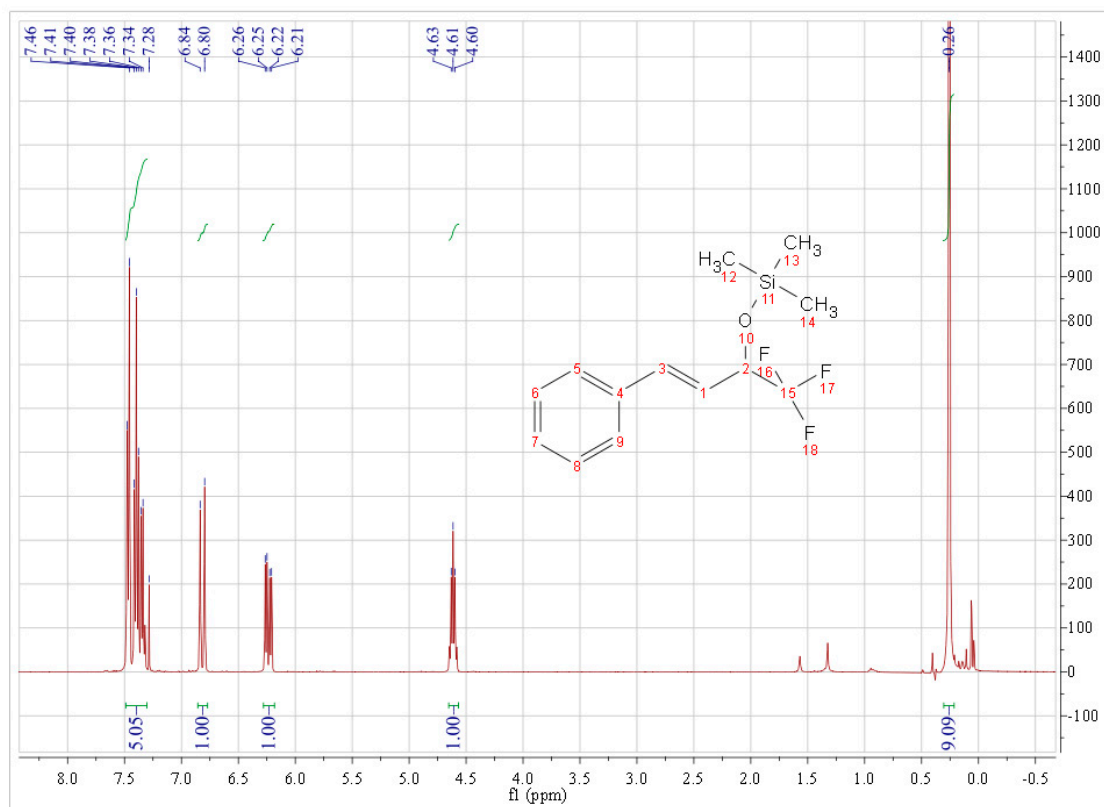

Figure S50  $^{13}\text{C}$  NMR spectra for compound 5b

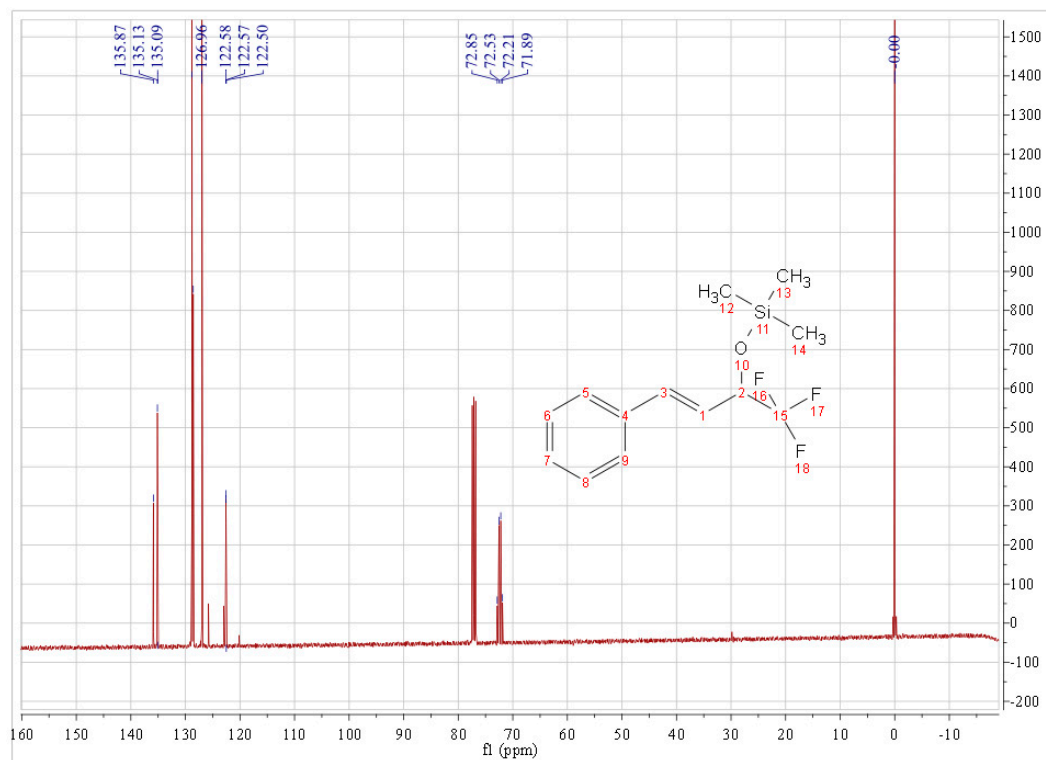

Figure S51  $^1\text{H}$  NMR spectra for compound 5c

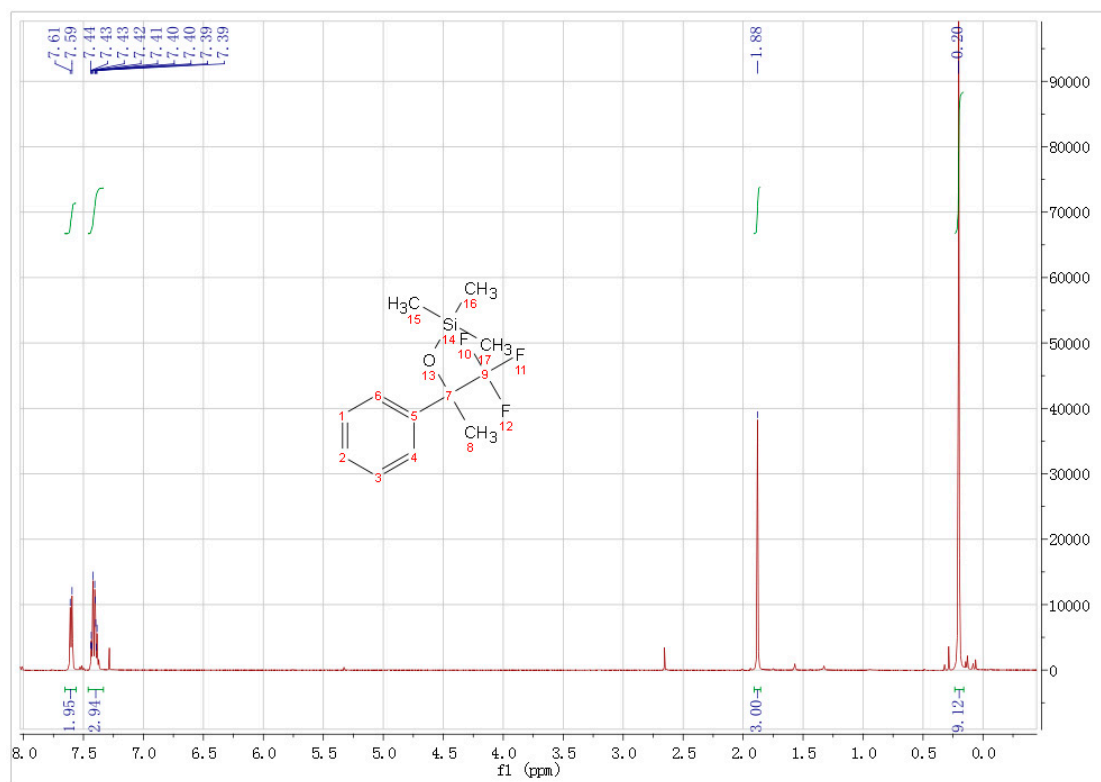

Figure S52  $^{13}\text{C}$  NMR spectra for compound 5c

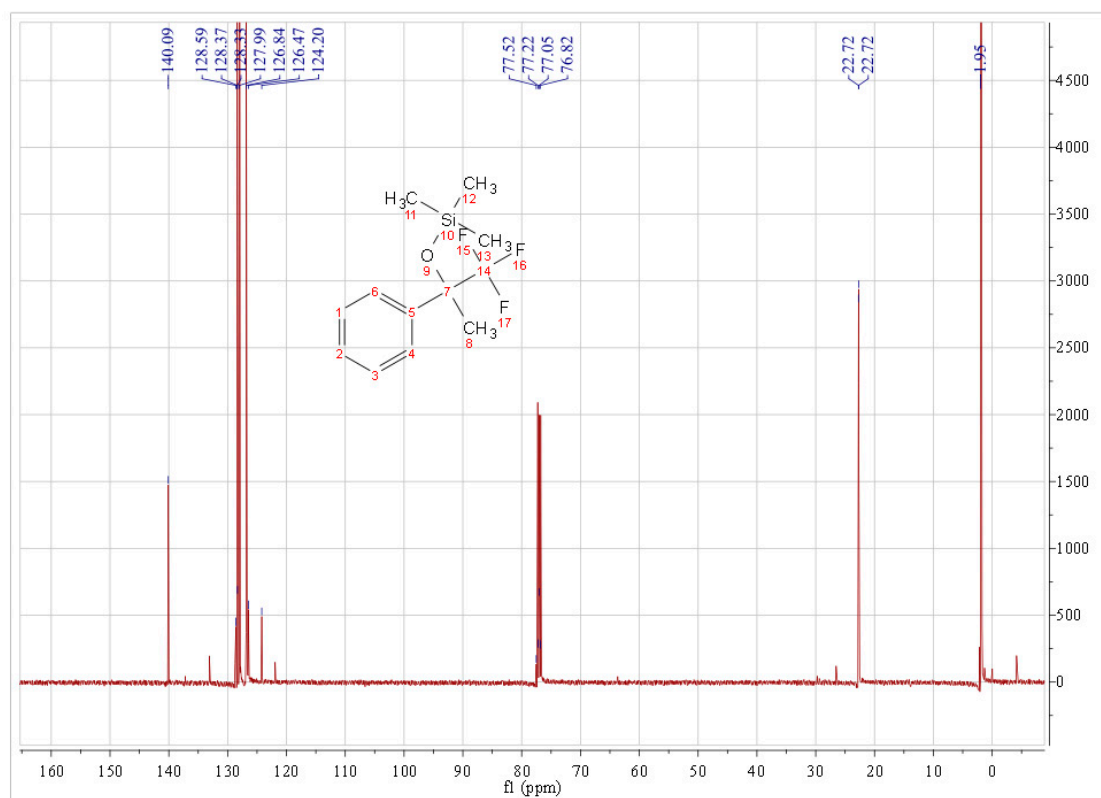

Figure S53  $^1\text{H}$  NMR spectra for compound 5d

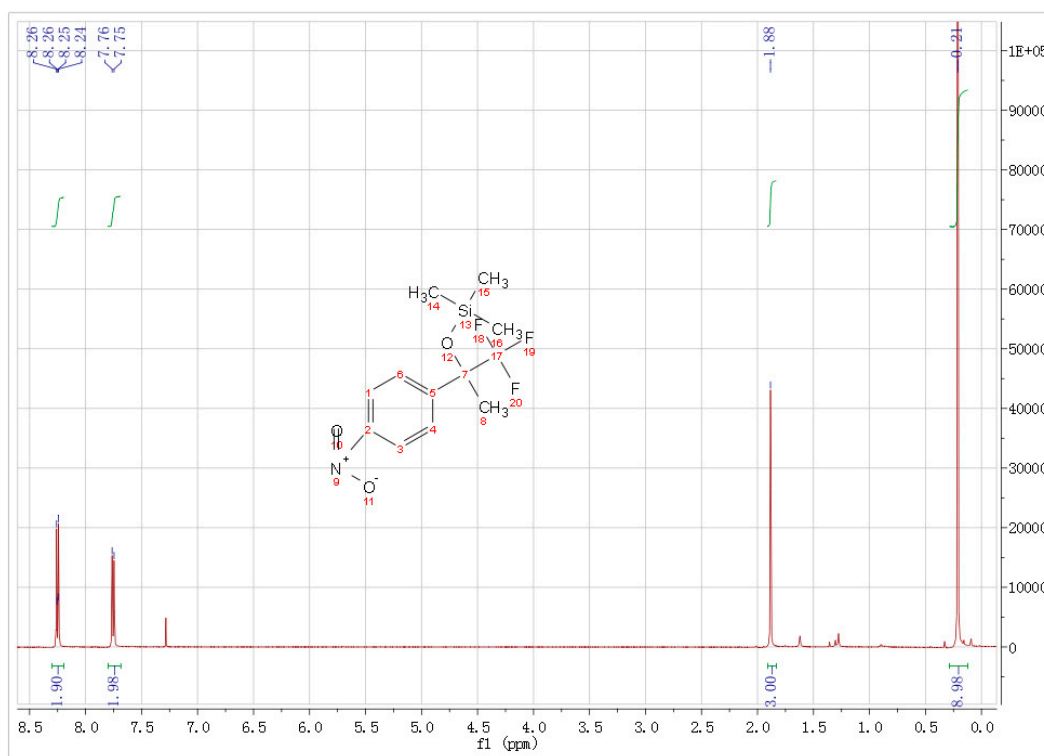

Figure S54  $^{13}\text{C}$  NMR spectra for compound 5d

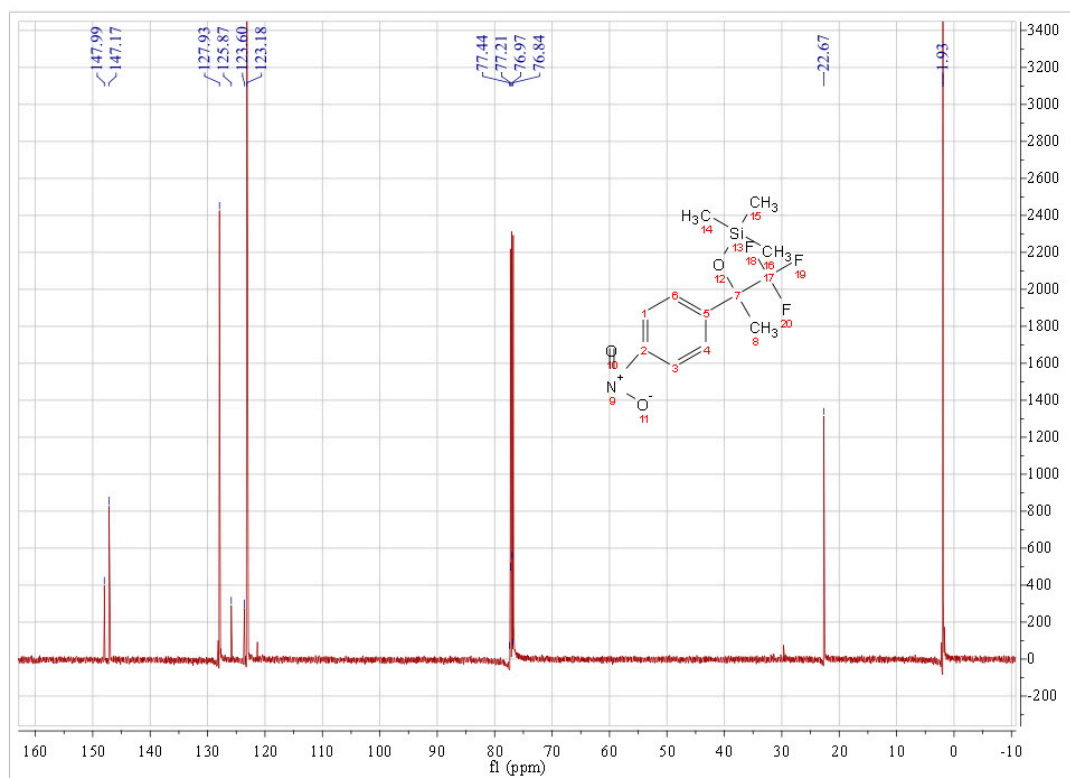



Figure S55  $^1\text{H}$  NMR spectra for compound 5e

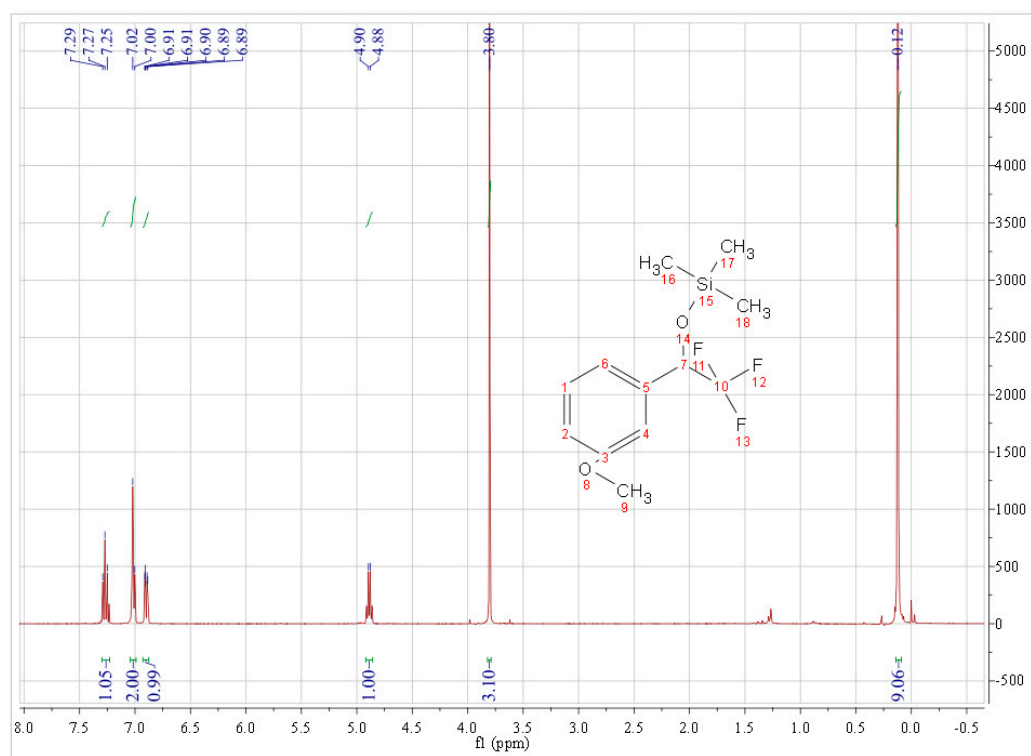

Figure S56  $^{13}\text{C}$  NMR spectra for compound 5e

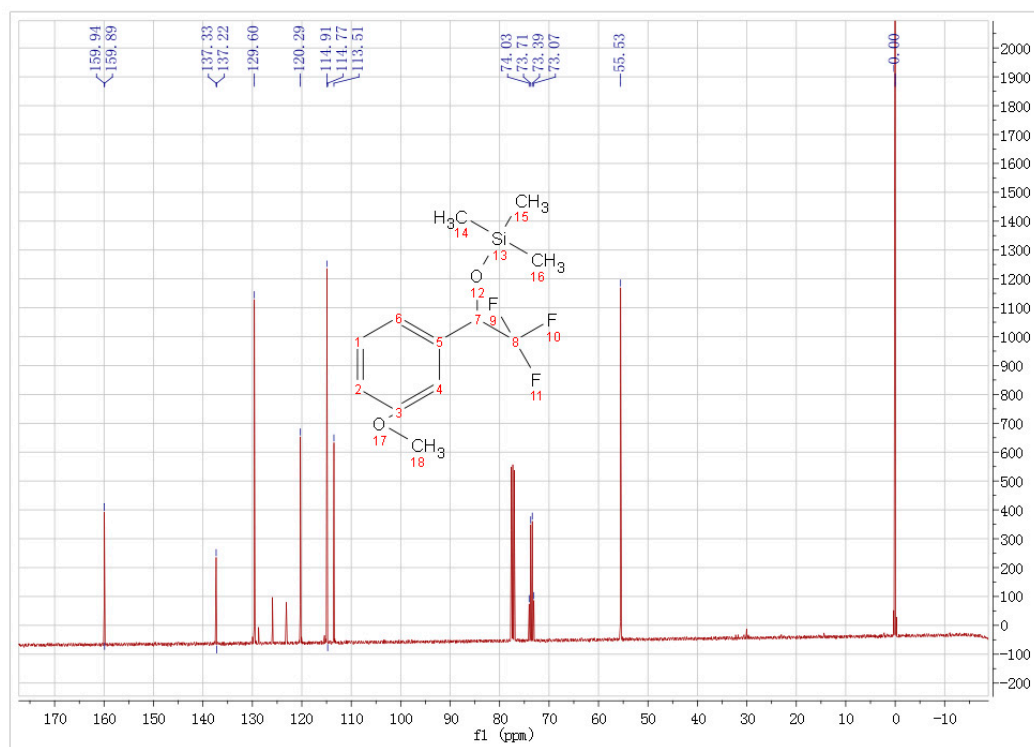

**Figure S57  $^1\text{H}$  NMR spectra for compound 5f**

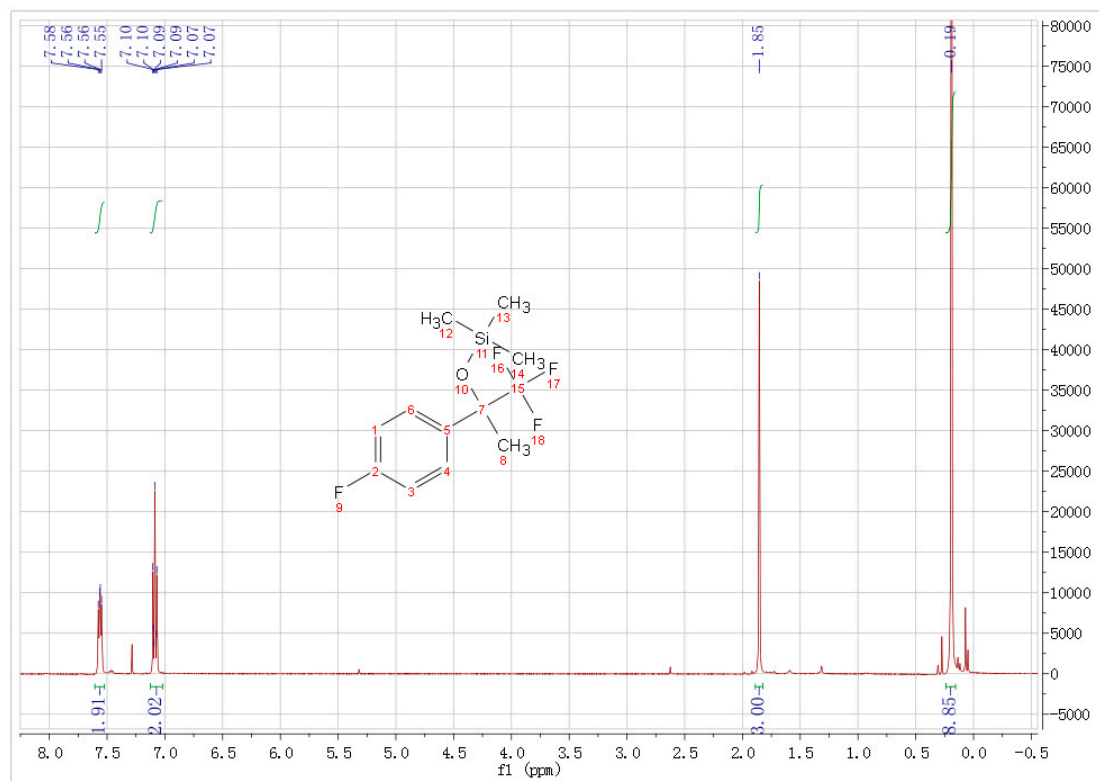

**Figure S58  $^{13}\text{C}$  NMR spectra for compound 5f**

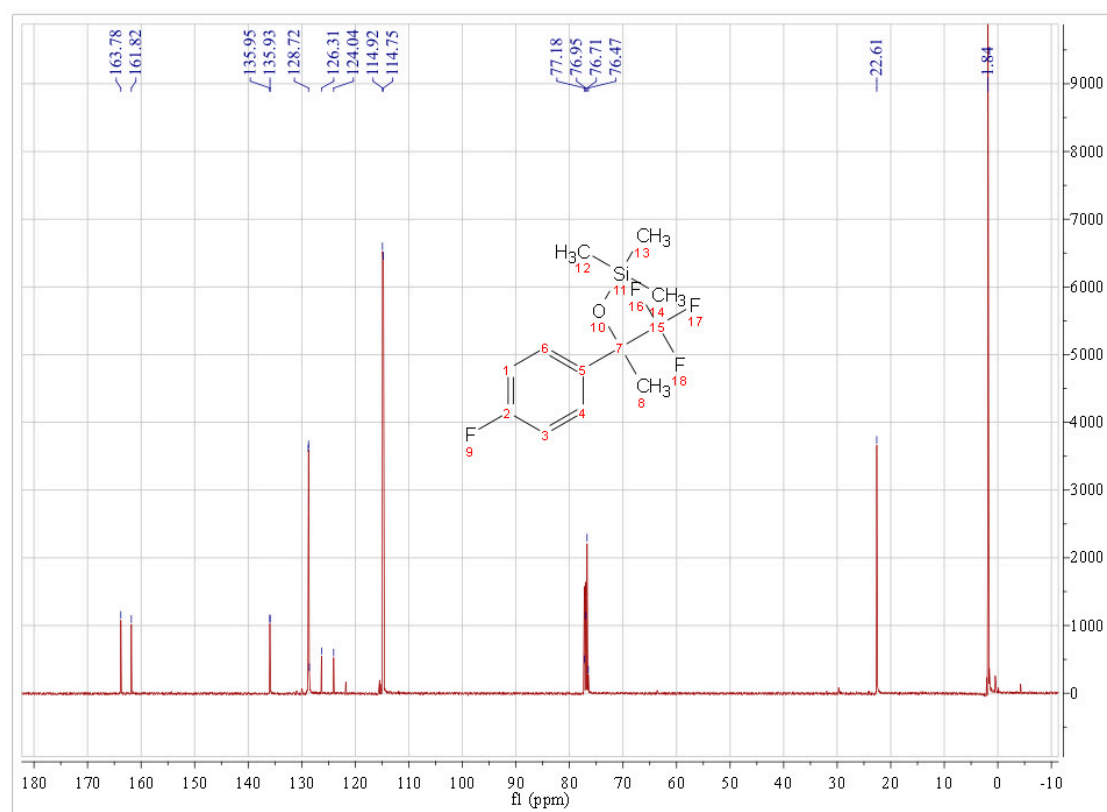

Figure S59  $^1\text{H}$  NMR spectra for compound 5g

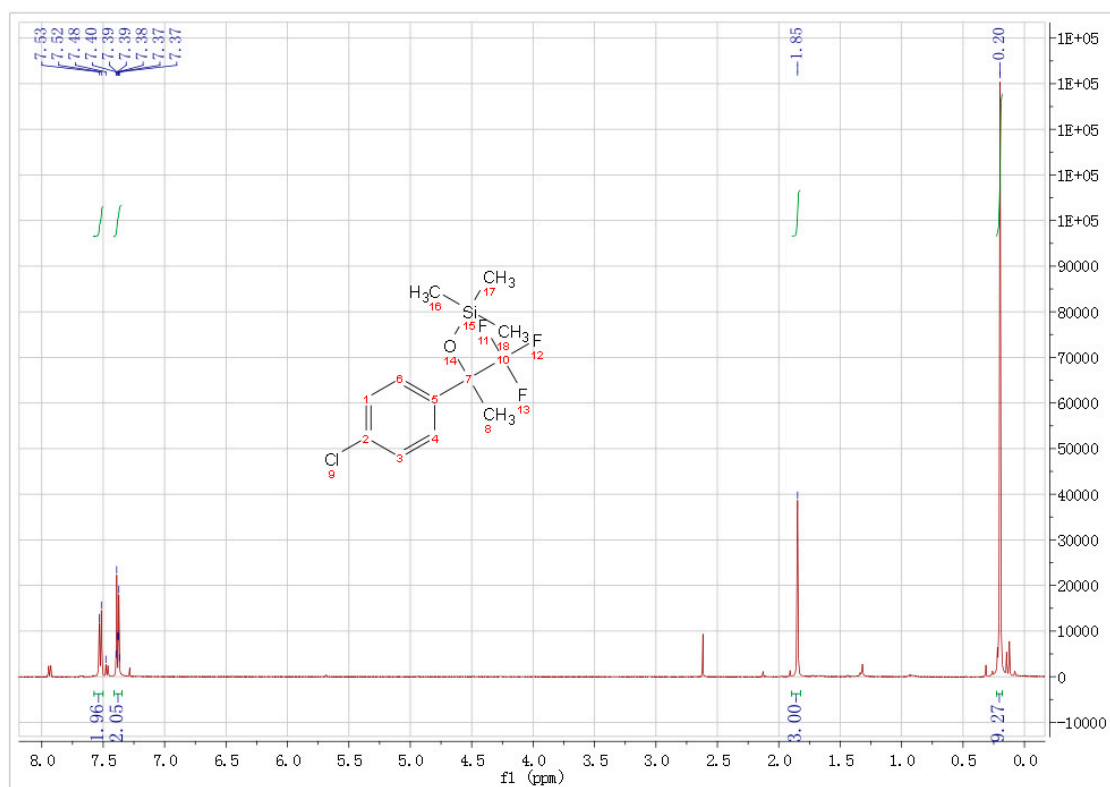

Figure S60  $^{13}\text{C}$  NMR spectra for compound 5g

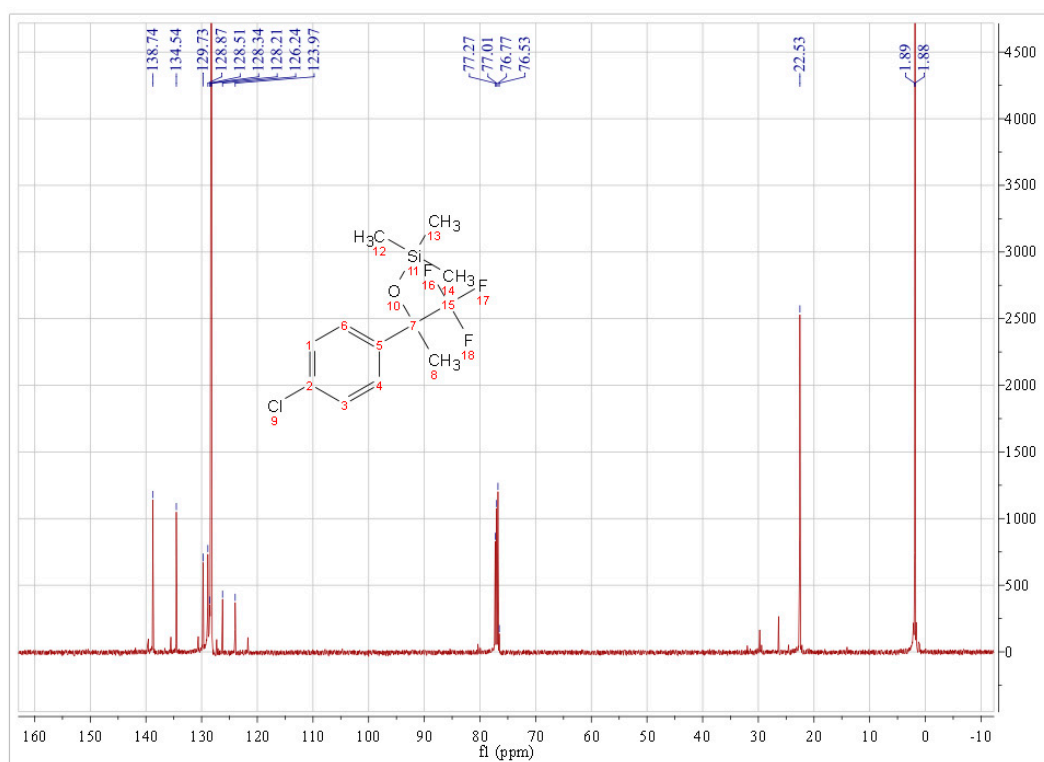

Figure S61  $^1\text{H}$  NMR spectra for compound 5h

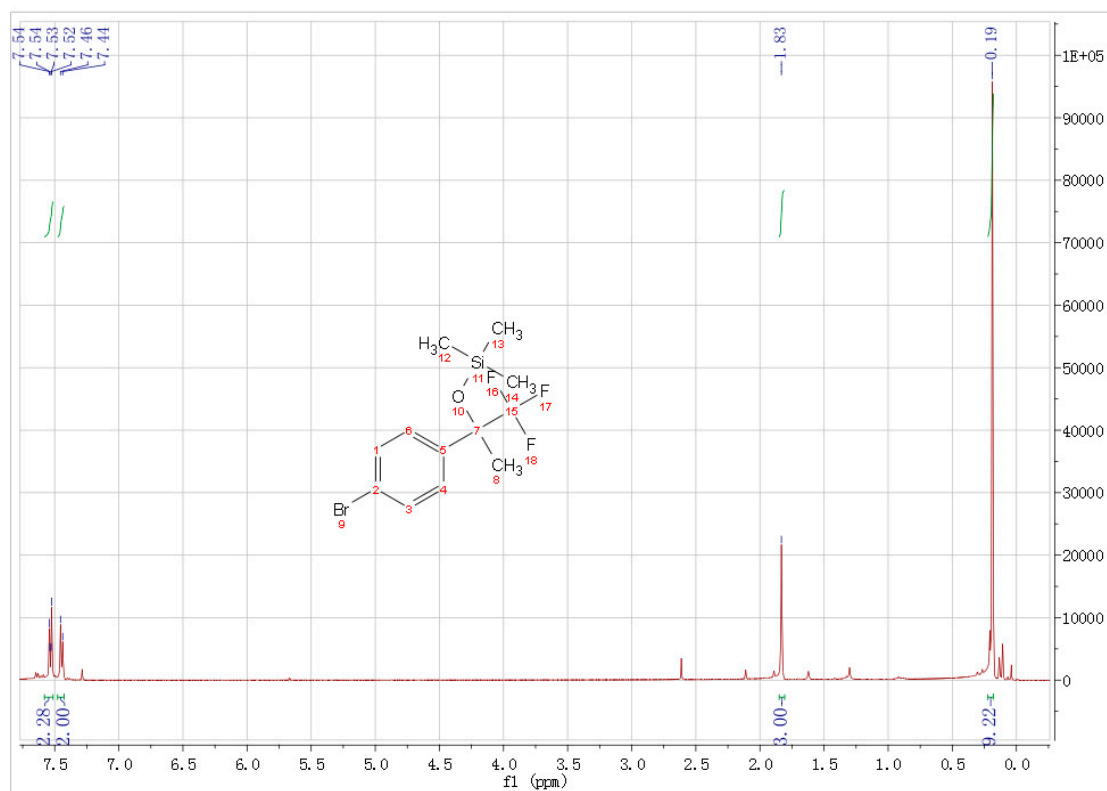

Figure S62  $^{13}\text{C}$  NMR spectra for compound 5h

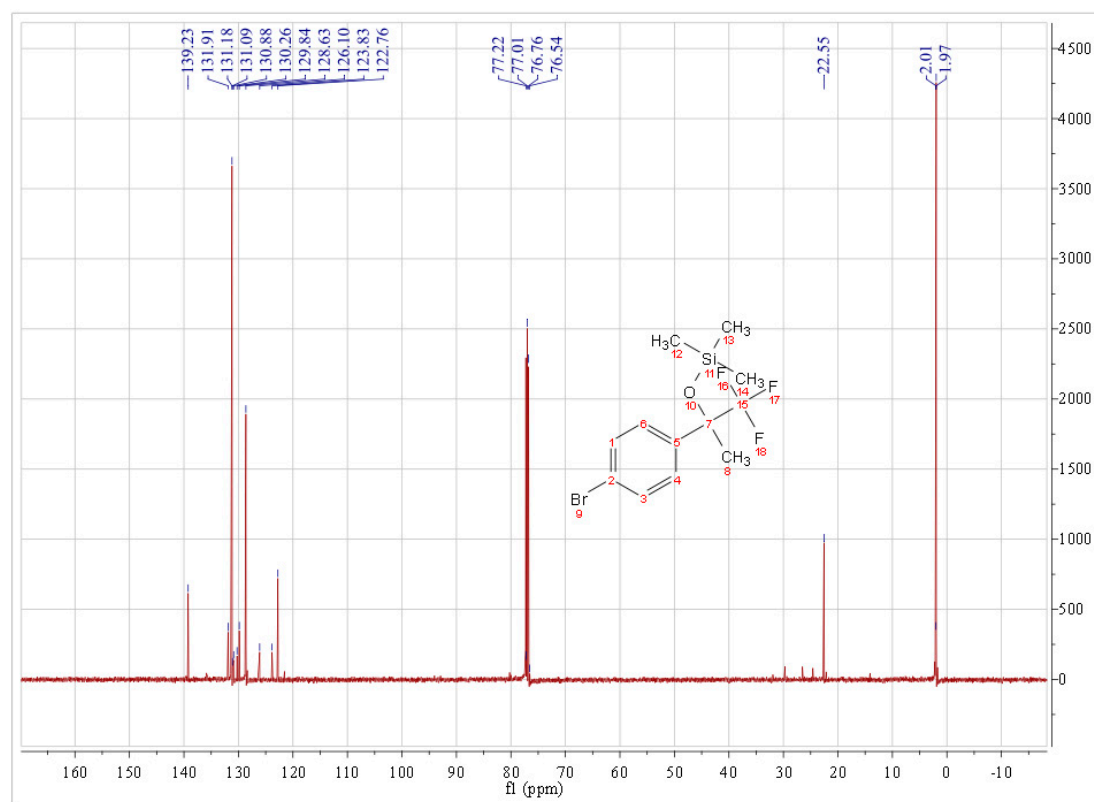

Figure S63  $^1\text{H}$  NMR spectra for compound 5i

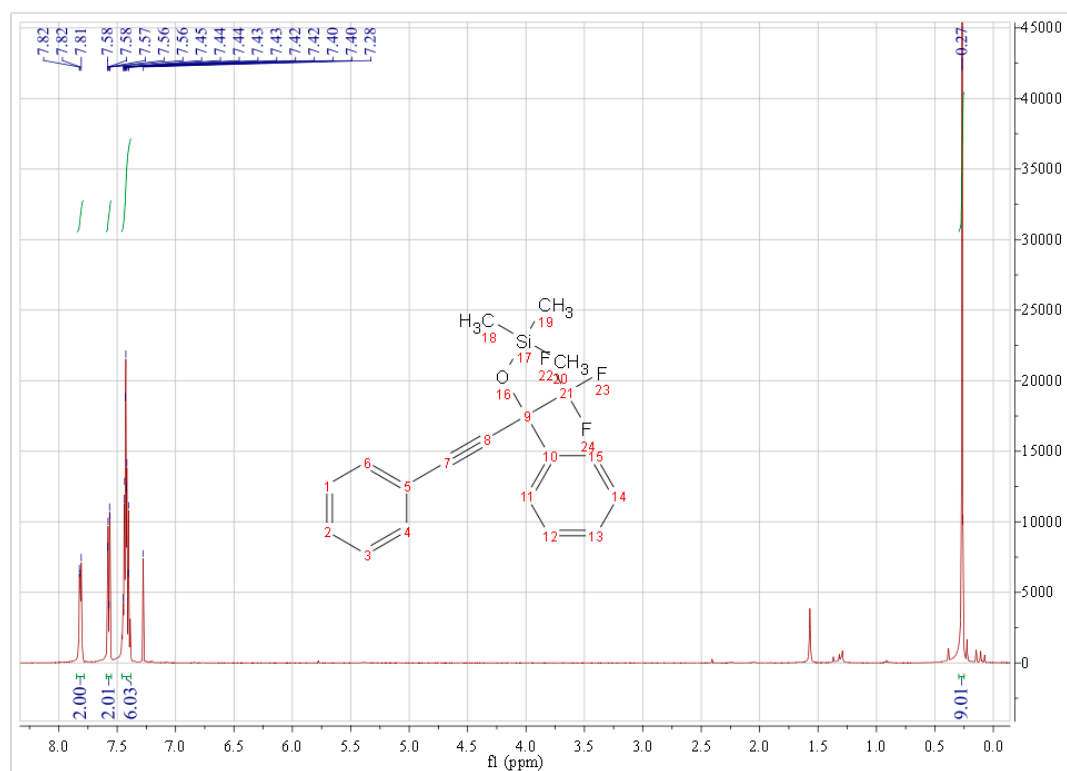

Figure S64  $^{13}\text{C}$  NMR spectra for compound 5i

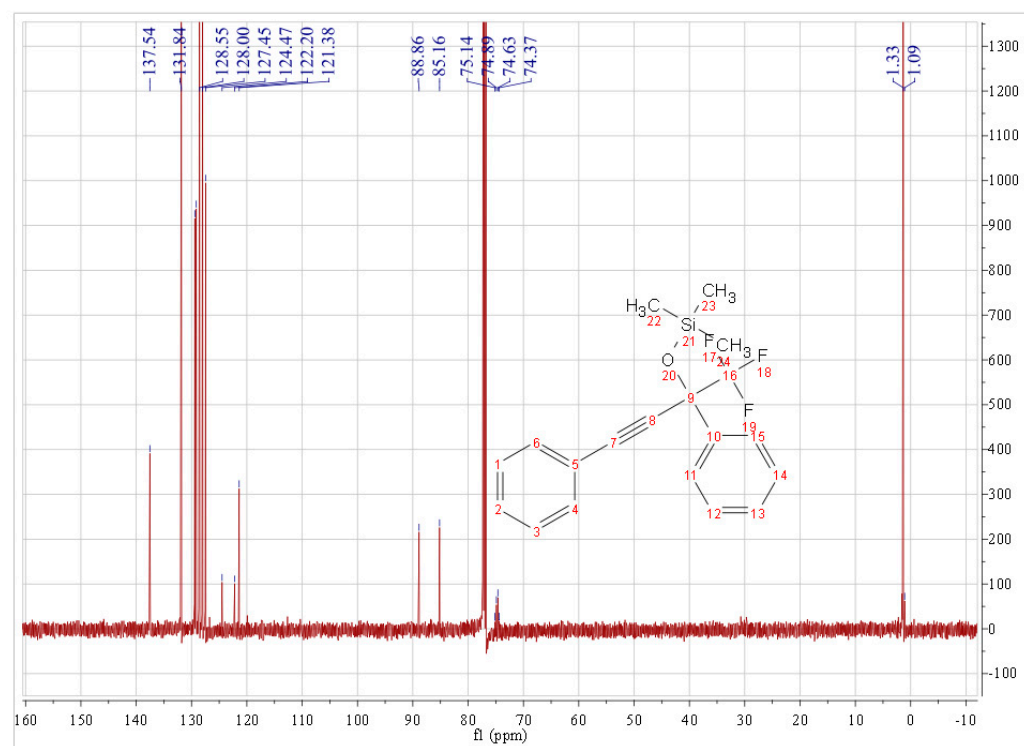

Figure S65  $^1\text{H}$  NMR spectra for compound 5j

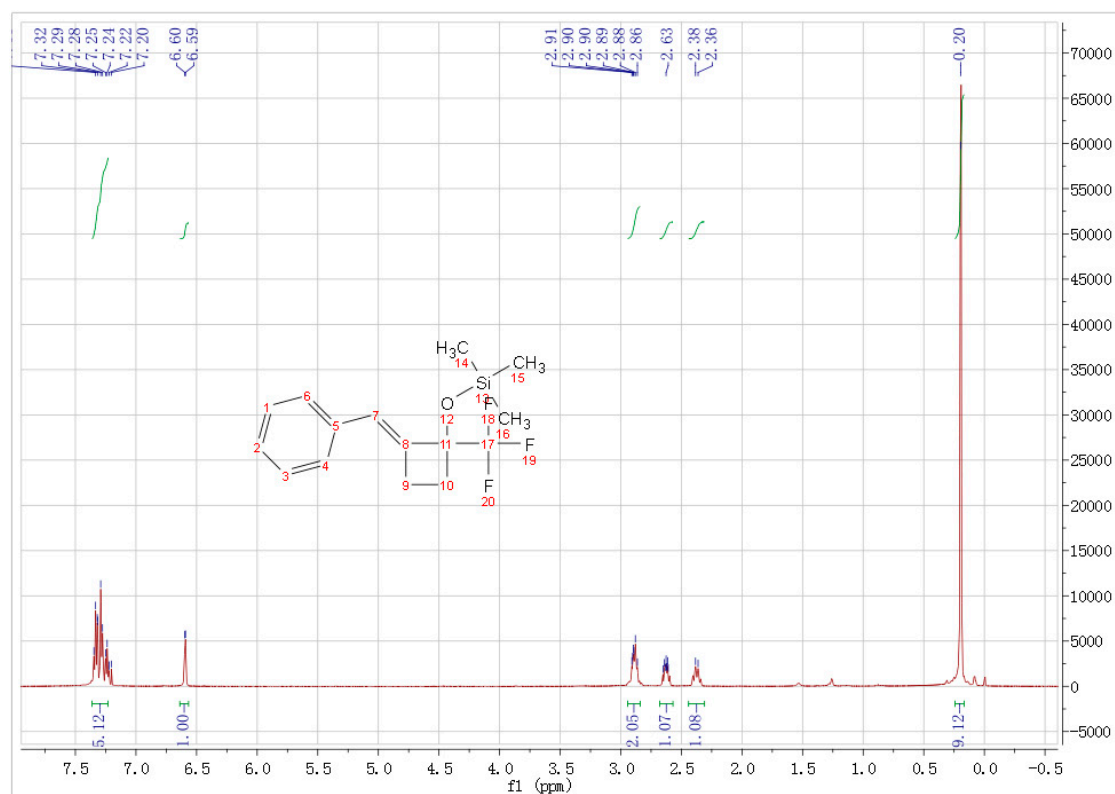

Figure S66  $^{13}\text{C}$  NMR spectra for compound 5j

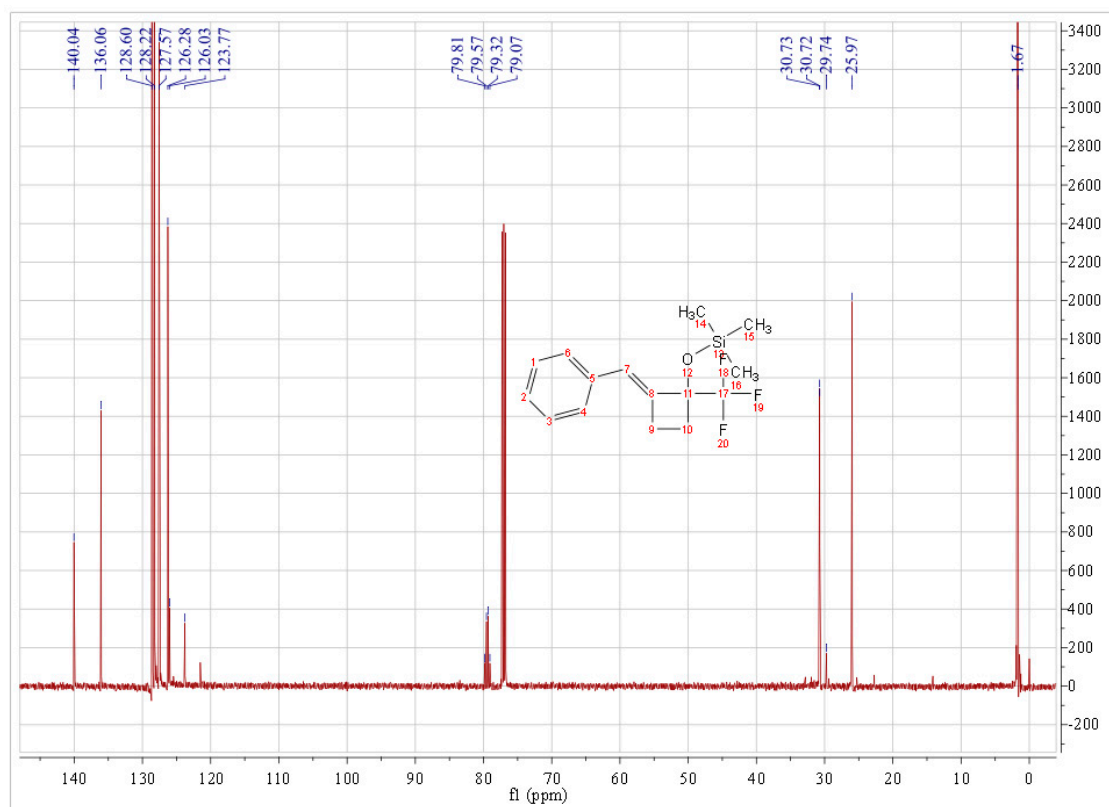

Figure S67  $^1\text{H}$  NMR spectra for compound 5k

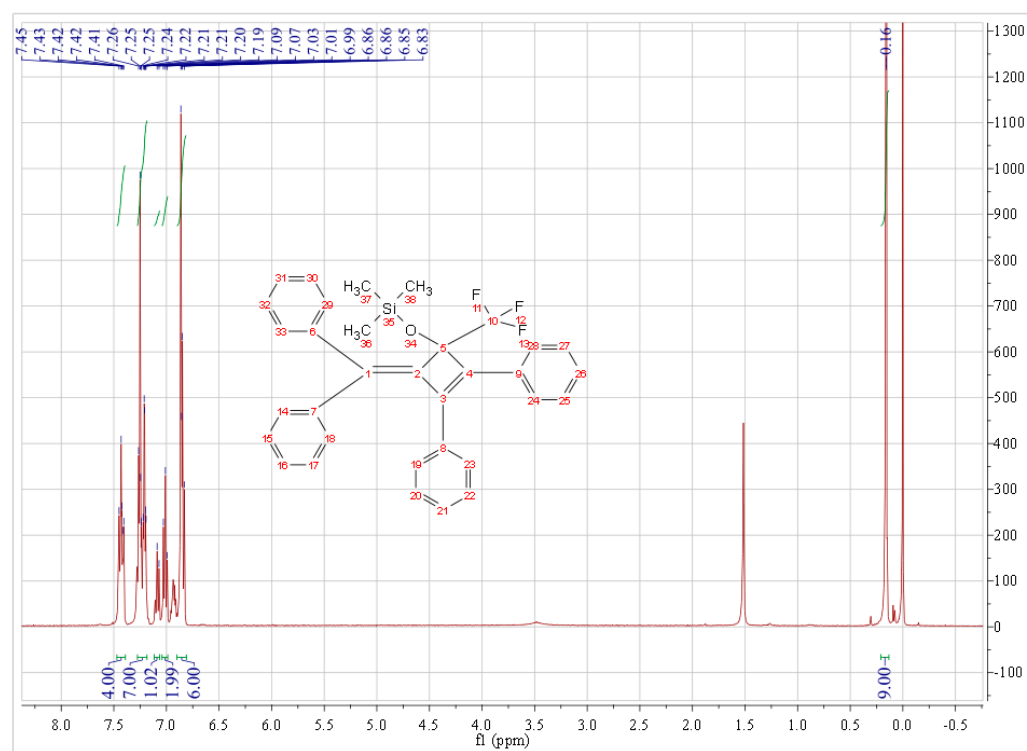

Figure S68  $^{13}\text{C}$  NMR spectra for compound 5k

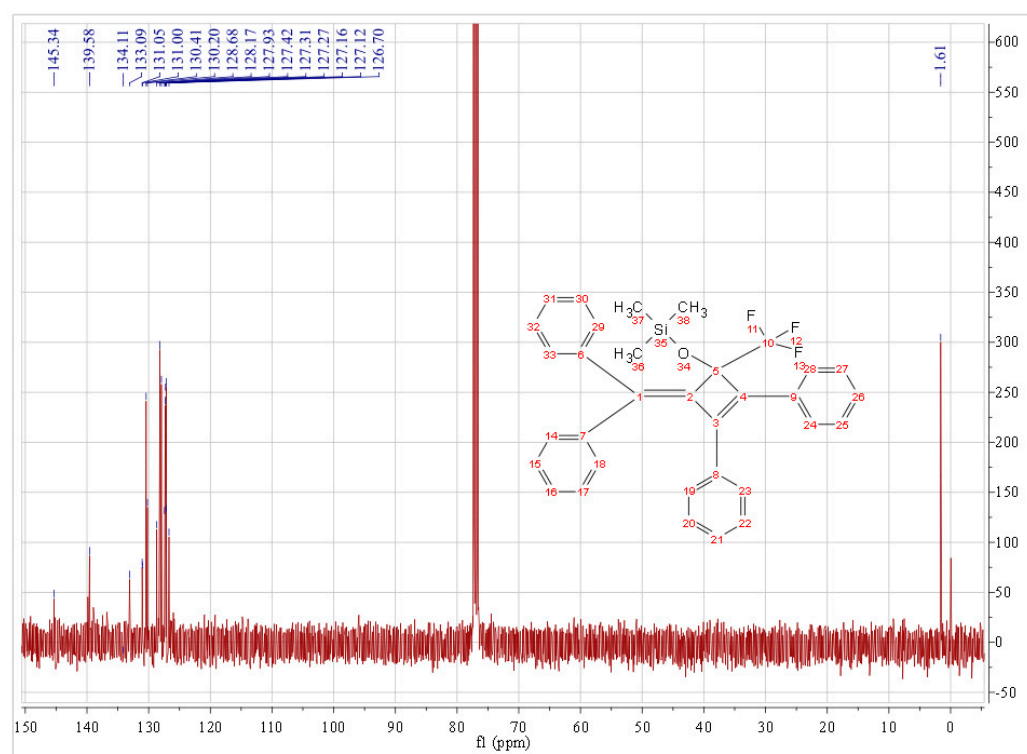

Supplement: s1 [file s1]
